# Supplementary material for: Microbial Communities of Cladonia Lichens and Their Biosynthetic Gene Clusters Potentially Encoding Natural Products
Source: MDPI journal article supplement (doi:10.3390/microorganisms9071347), 2021-06-22
Supplement: s1 [file s1]

# Microbial Communities of *Cladonia* Lichens and Their Biosynthetic Gene Clusters Potentially Encoding Natural Products

Tânia Keiko Shishido <sup>1,\*</sup>, Matti Wahlsten <sup>2</sup>, Pia Laine <sup>1</sup>, Jouko Rikkinen <sup>3,4</sup>, Taina Lundell <sup>2</sup> and Petri Auvinen <sup>1</sup>

<sup>1</sup> Institute of Biotechnology, University of Helsinki, P.O.Box 56, 00014 Helsinki, Finland; pia.k.laine@helsinki.fi (P.L.); petri.auvinen@helsinki.fi (P.A.)

<sup>2</sup> Department of Microbiology, Faculty of Agriculture and Forestry, University of Helsinki, P.O.Box 56, 00014 Helsinki, Finland; matti.wahlsten@helsinki.fi (M.W.); taina.lundell@helsinki.fi (T.L.)

<sup>3</sup> Finnish Museum of Natural History, Botany Unit, University of Helsinki, P.O. Box 7, 00014 Helsinki, Finland; jouko.rikkinen@helsinki.fi

<sup>4</sup> Organismal and Evolutionary Biology Research Programme, Faculty of Biological and Environmental Sciences, University of Helsinki, P.O. Box 65, 00014 Helsinki, Finland

\* Correspondence: taniakeiko@gmail.com

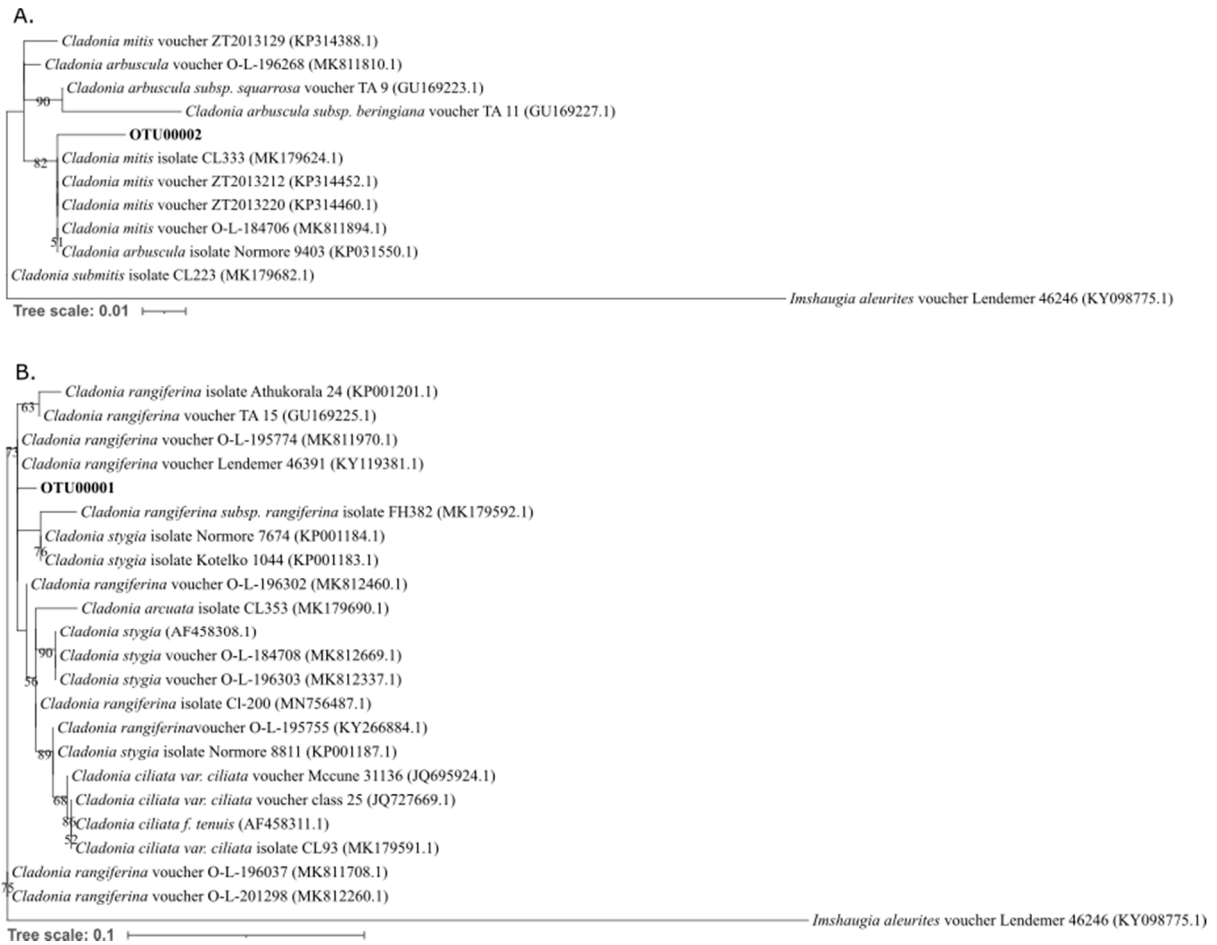

**Figure S1.** Maximum likelihood phylogenetic tree constructed using representative ITS2 amplicon sequences of two operational taxonomic units OTU 00002 (A) and OTU00001 (B) obtained from mothur analysis. Values above 50 % for the support of each node after 1000 bootstraps are shown.

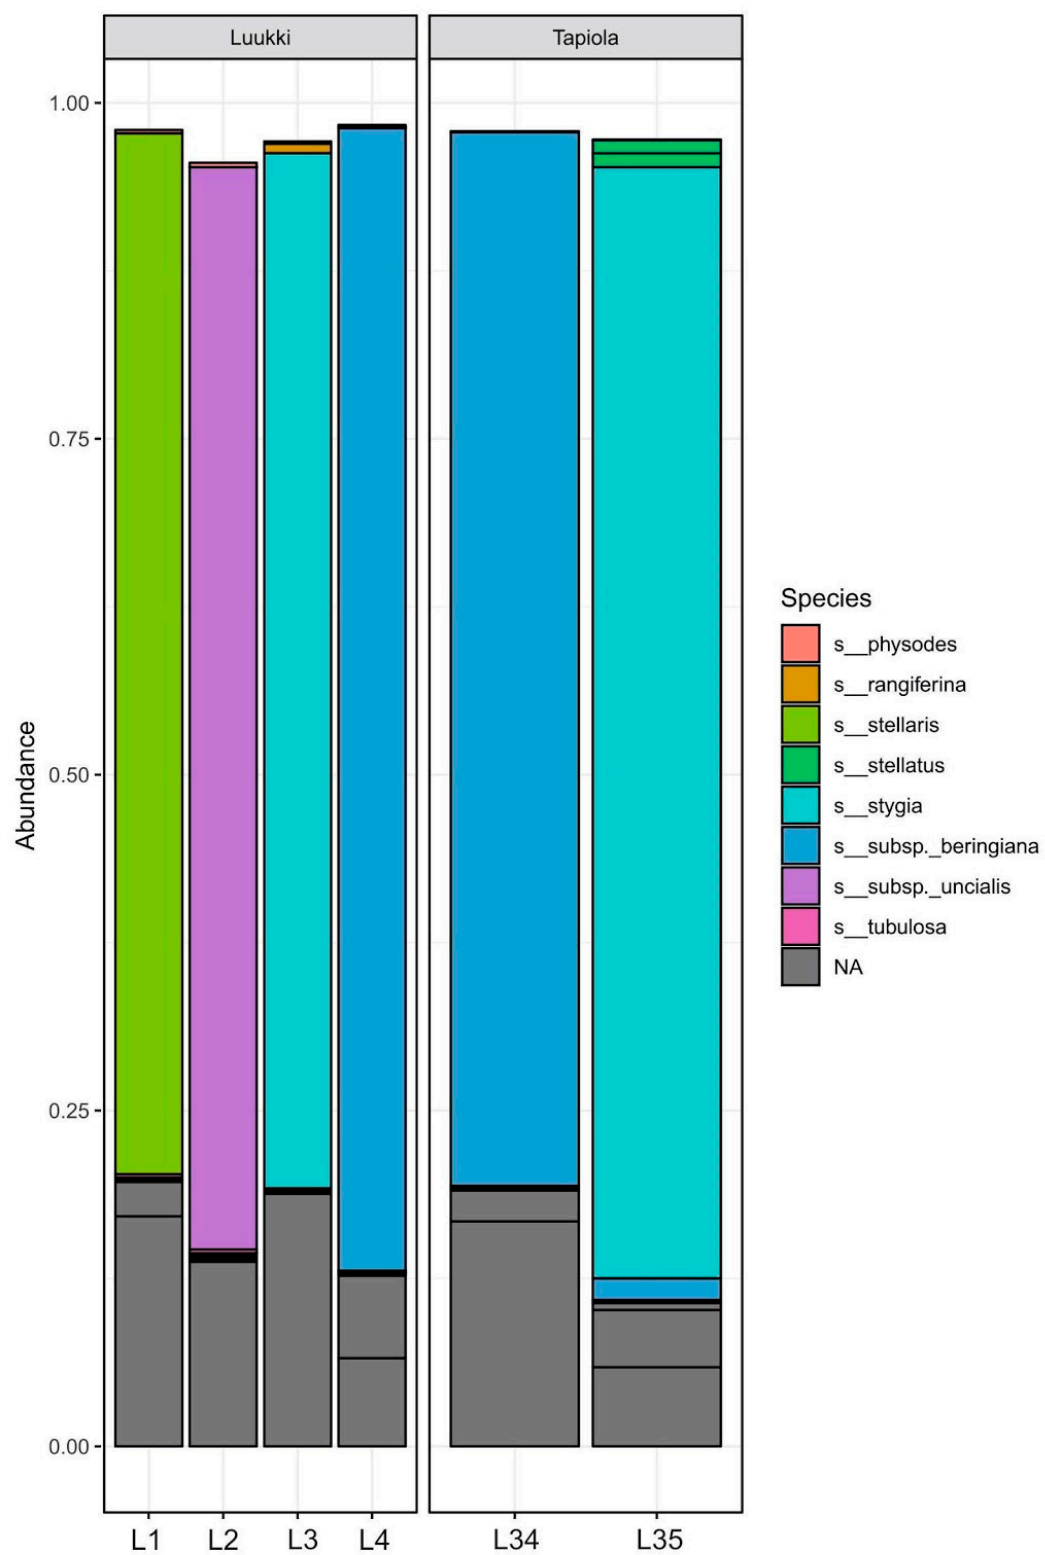

**Figure S2.** Microbial community at species taxonomic level inferred by DADA2 based on amplicon sequence variants (ASVs) from samples collected from a boreal forest (Luukki) and urban area (Tapiola) sites.

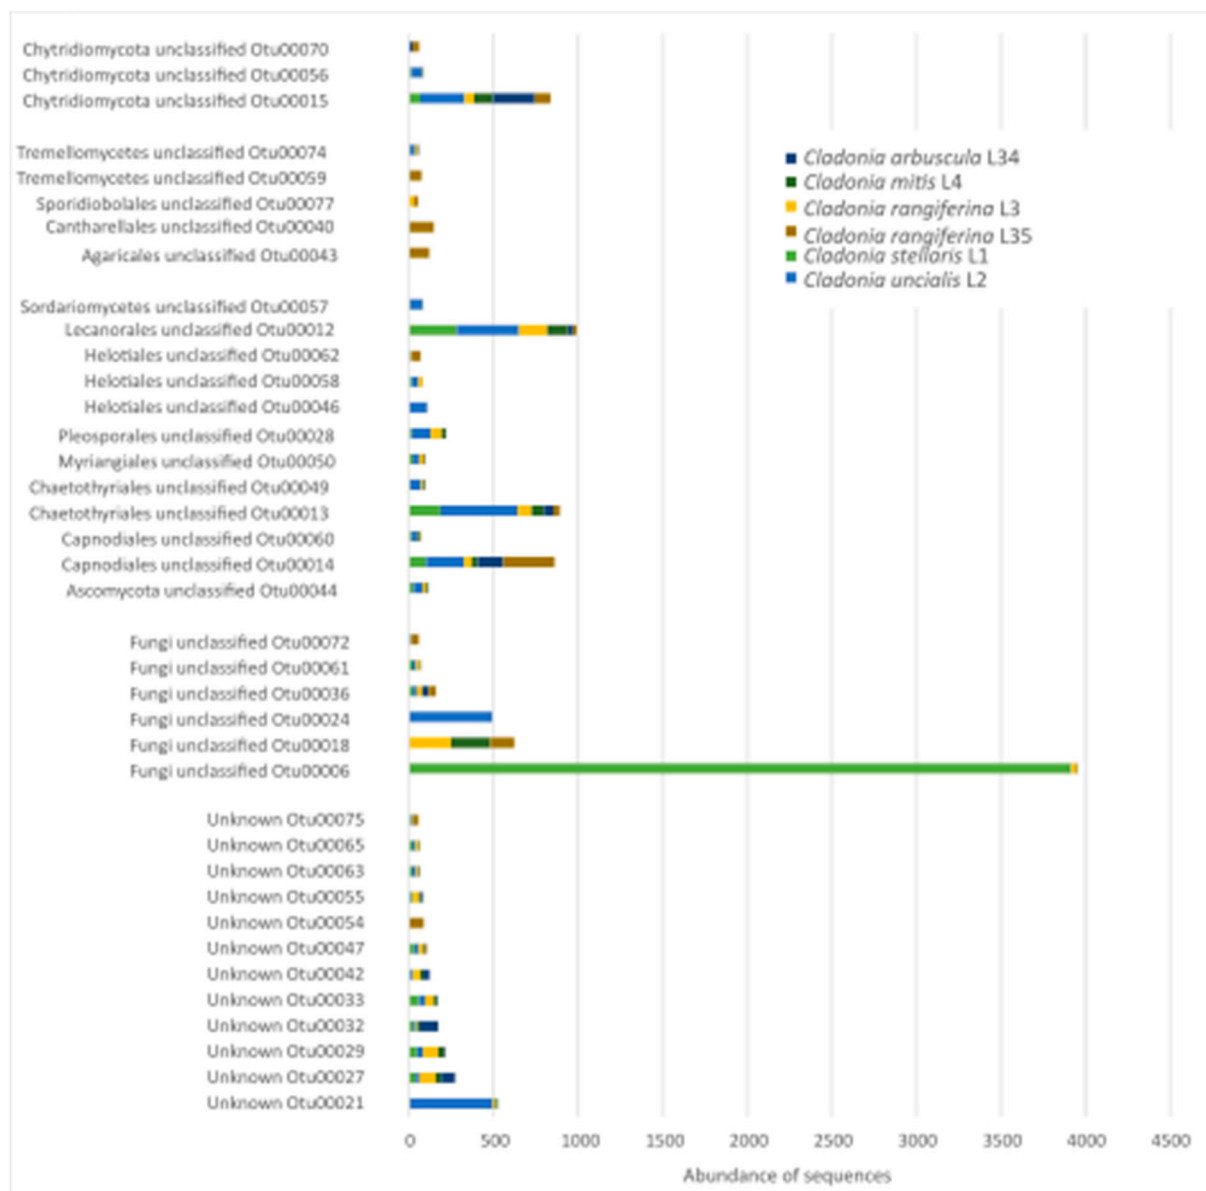

**Figure S3.** Number of unclassified ITS2 sequences at family taxonomic level (n > 50) per sample.

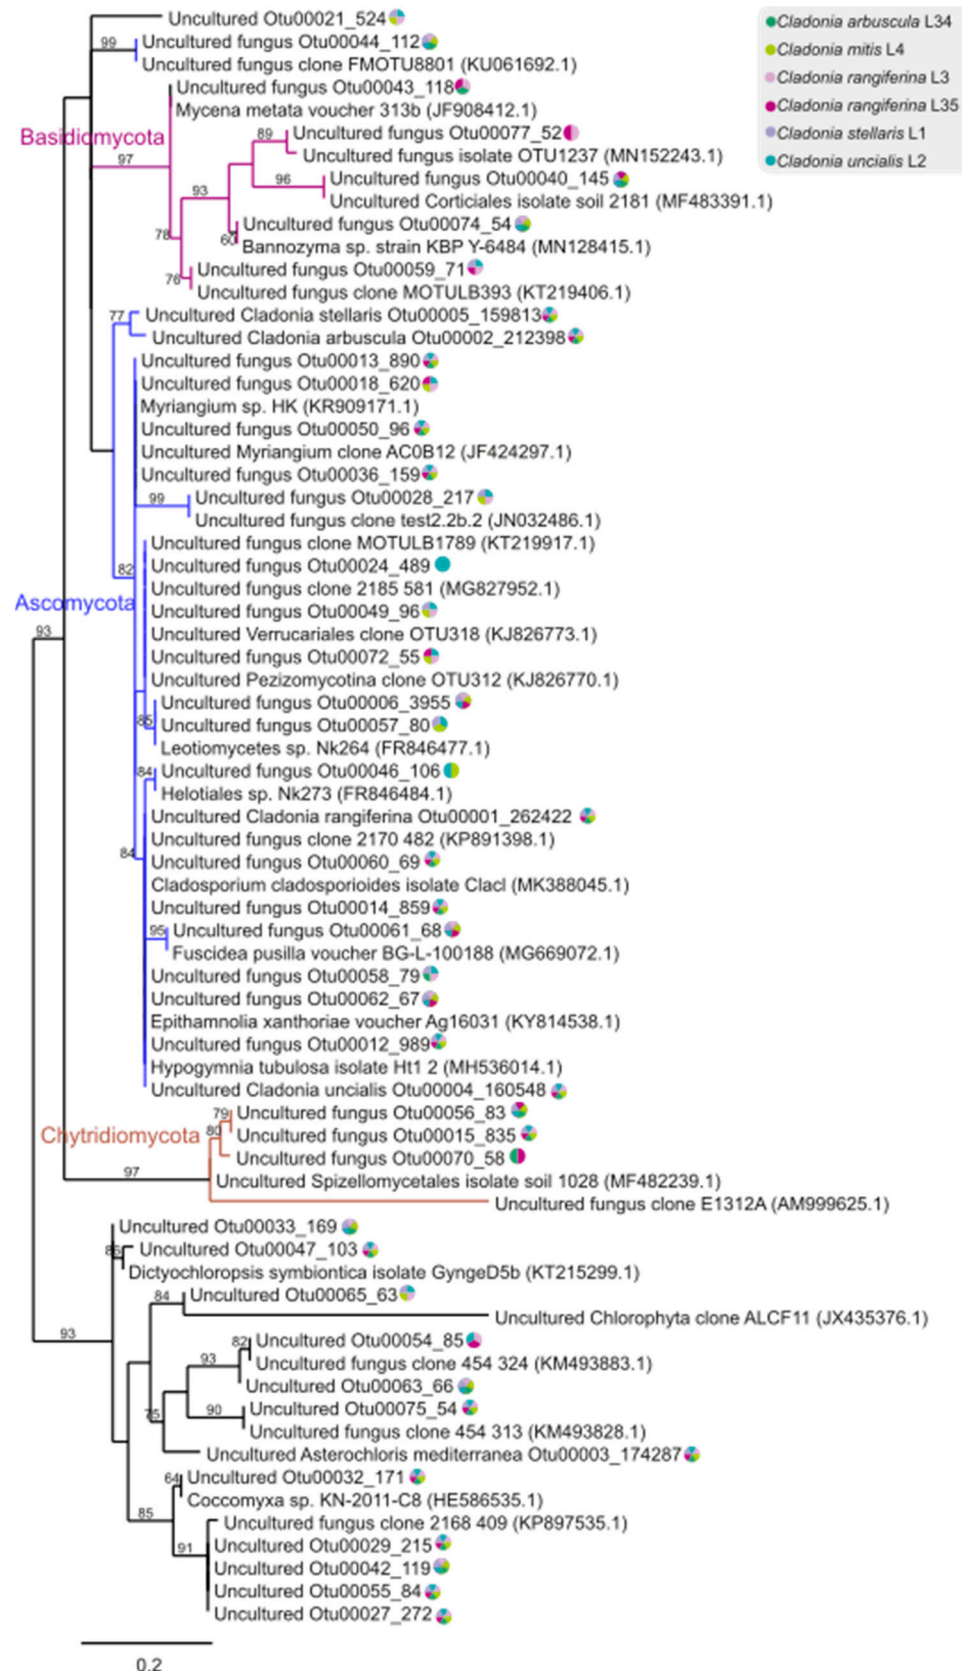

**Figure S4.** Evolutionary history based on ITS2 unclassified operational taxonomic units (OTUs with above 50 sequences). The legends indicate the samples which contained the OTUs. Otu0006 mentioned in the main text is shown in bold.

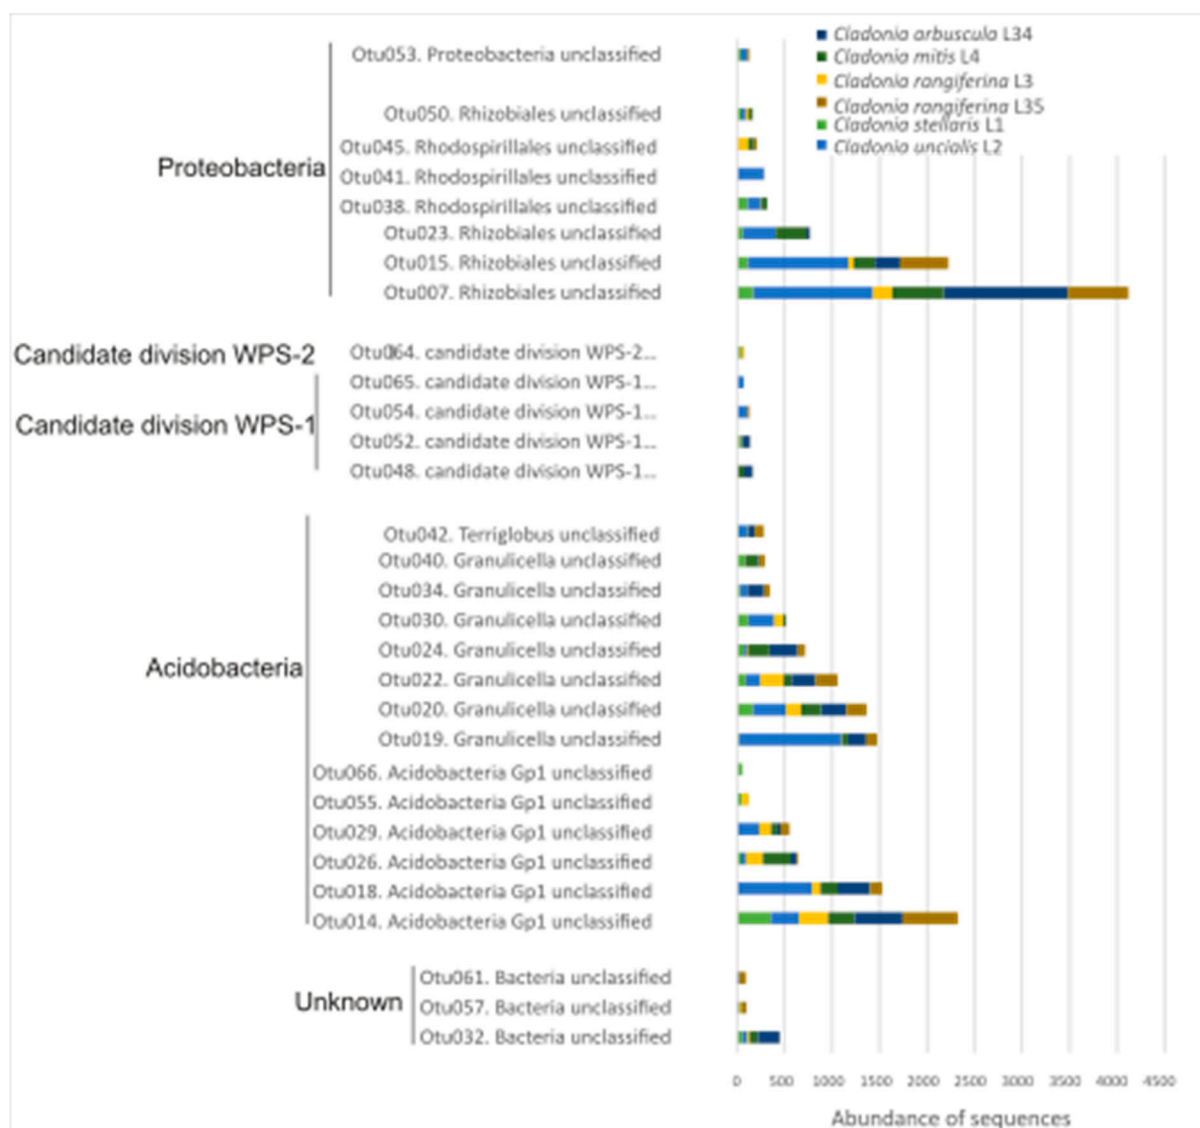

Figure S5. Number of unclassified 16S OTUs at predicted family level obtained per lichen sample.

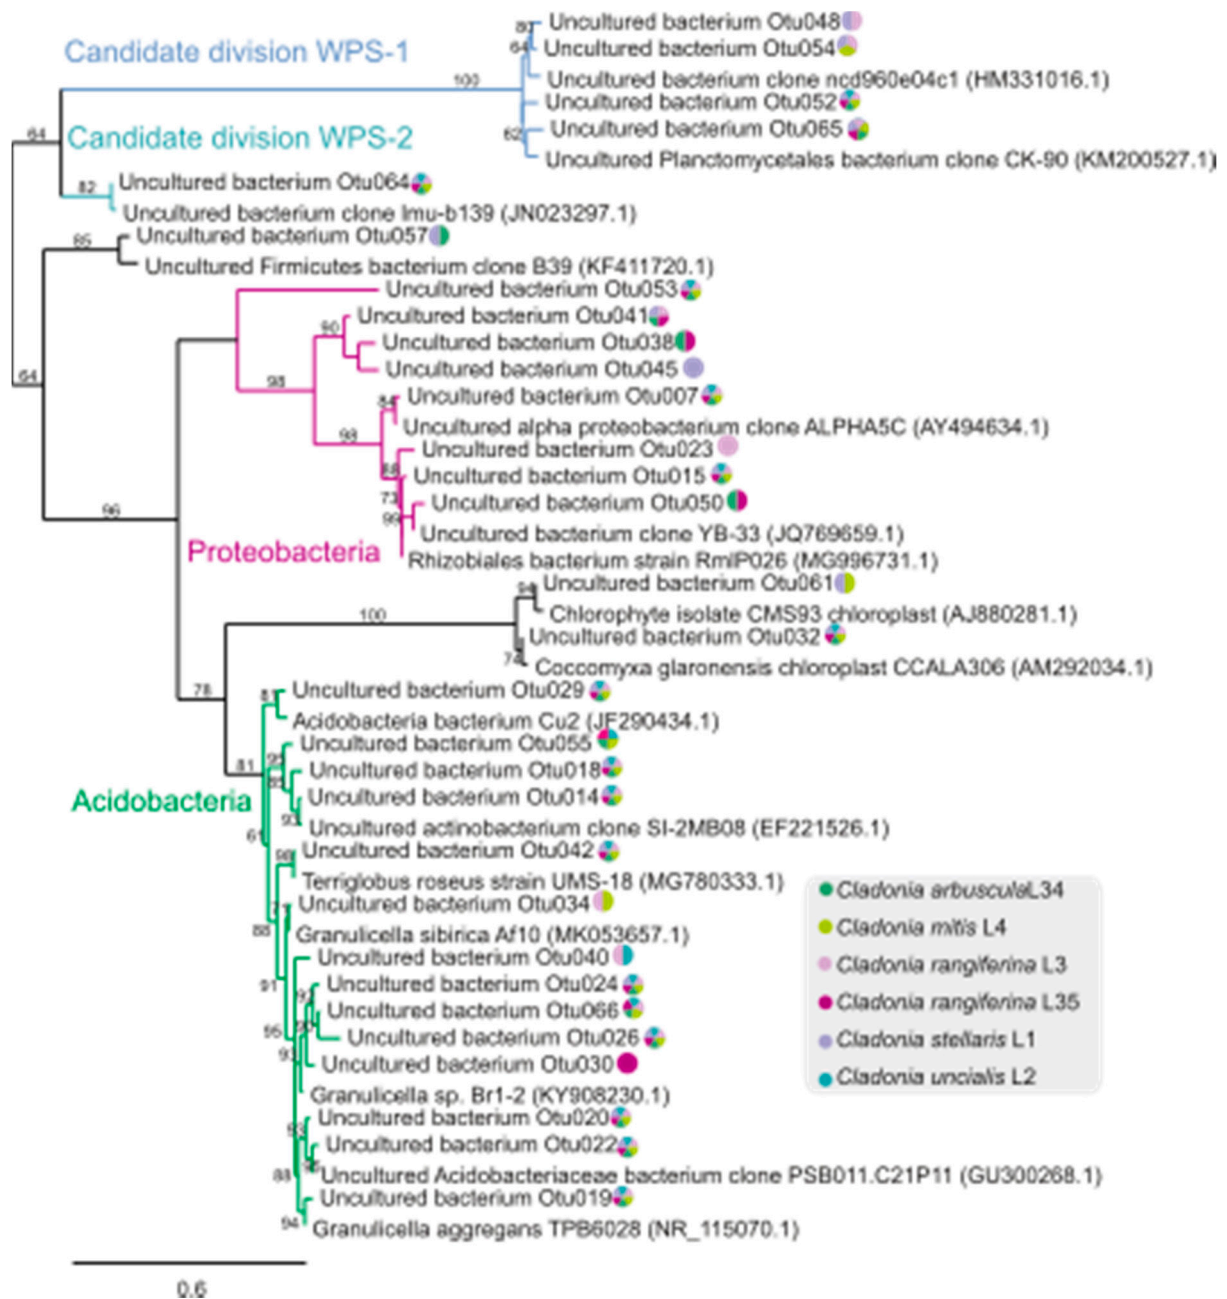

**Figure S6.** Evolutionary history based on 16S rRNA gene V3-V4 region unclassified sequences of representative operational taxonomic units (OTUs) above n = 50. The legends indicate the lichen samples which contained the OTUs.

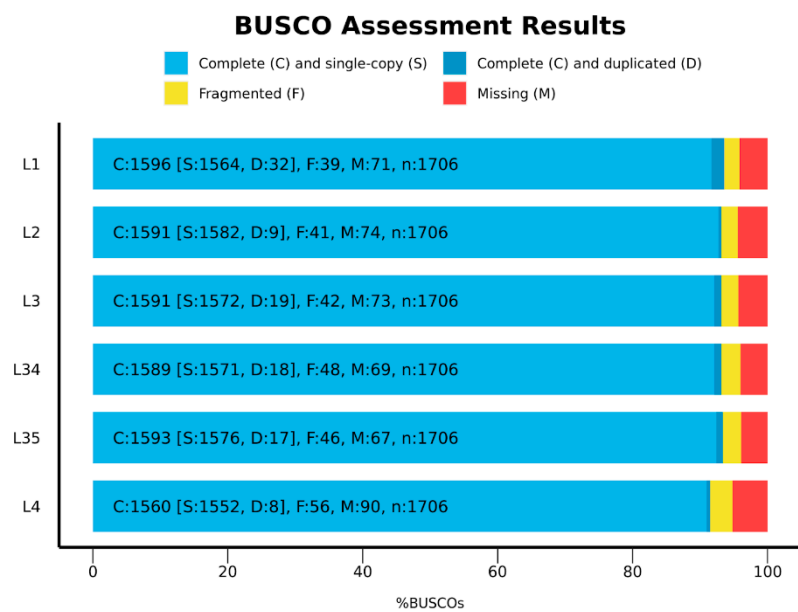

**Figure S7.** Completeness assignment based on 1706 expected gene content using BUSCO.



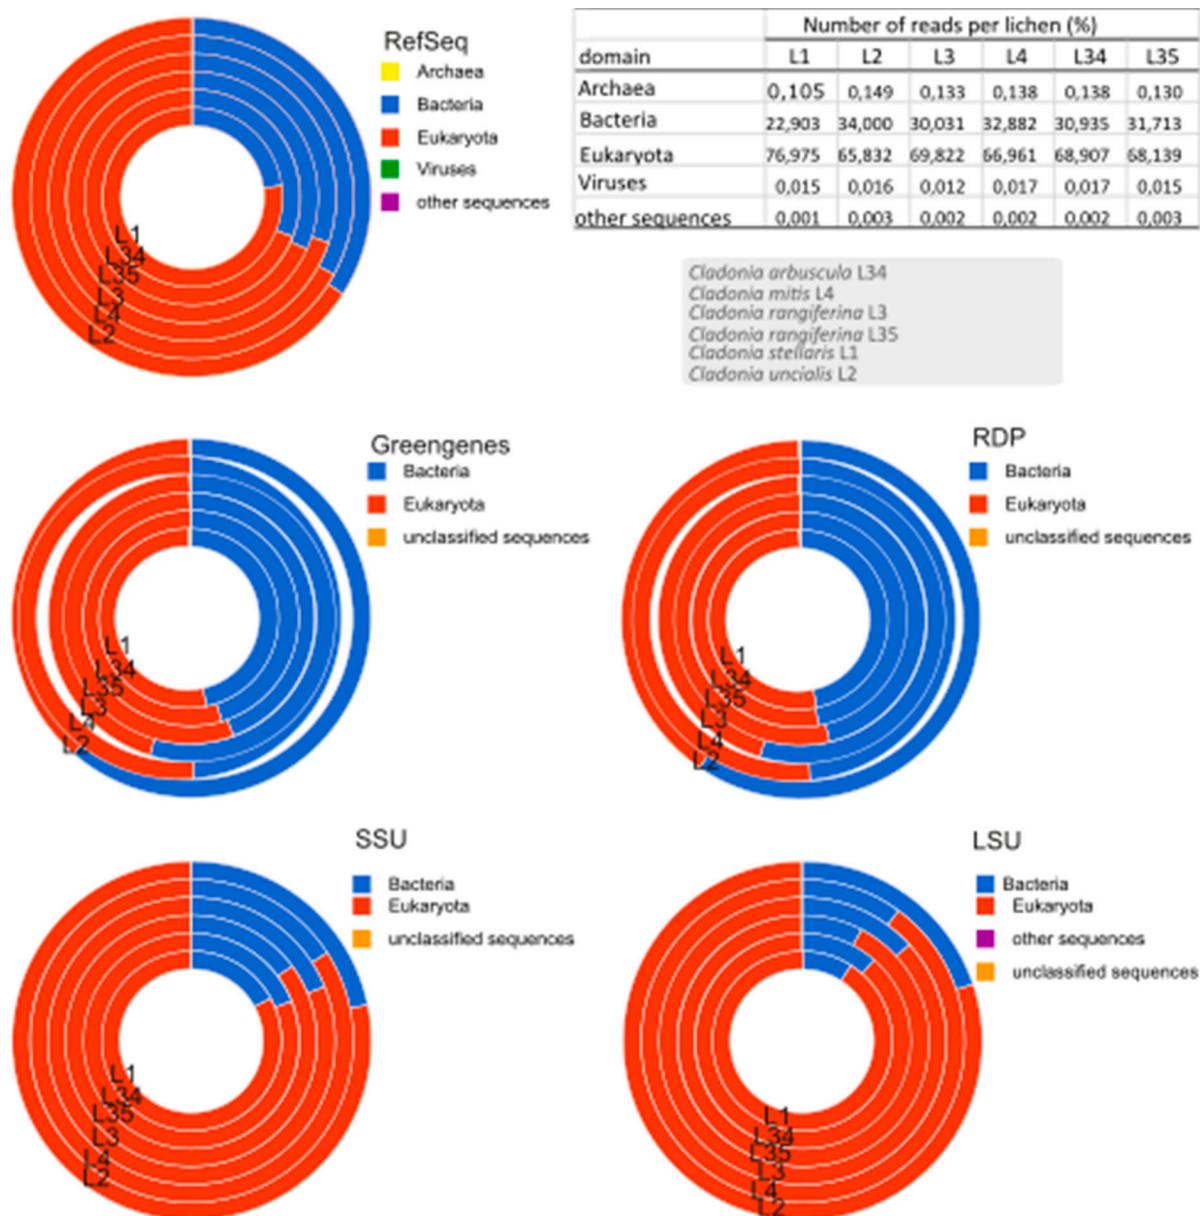

**Figure S8.** Taxonomic assignment of shotgun sequences obtained using different databases in MG-RAST. The inserted table indicates the percentage of reads assigned to different taxonomic taxa.

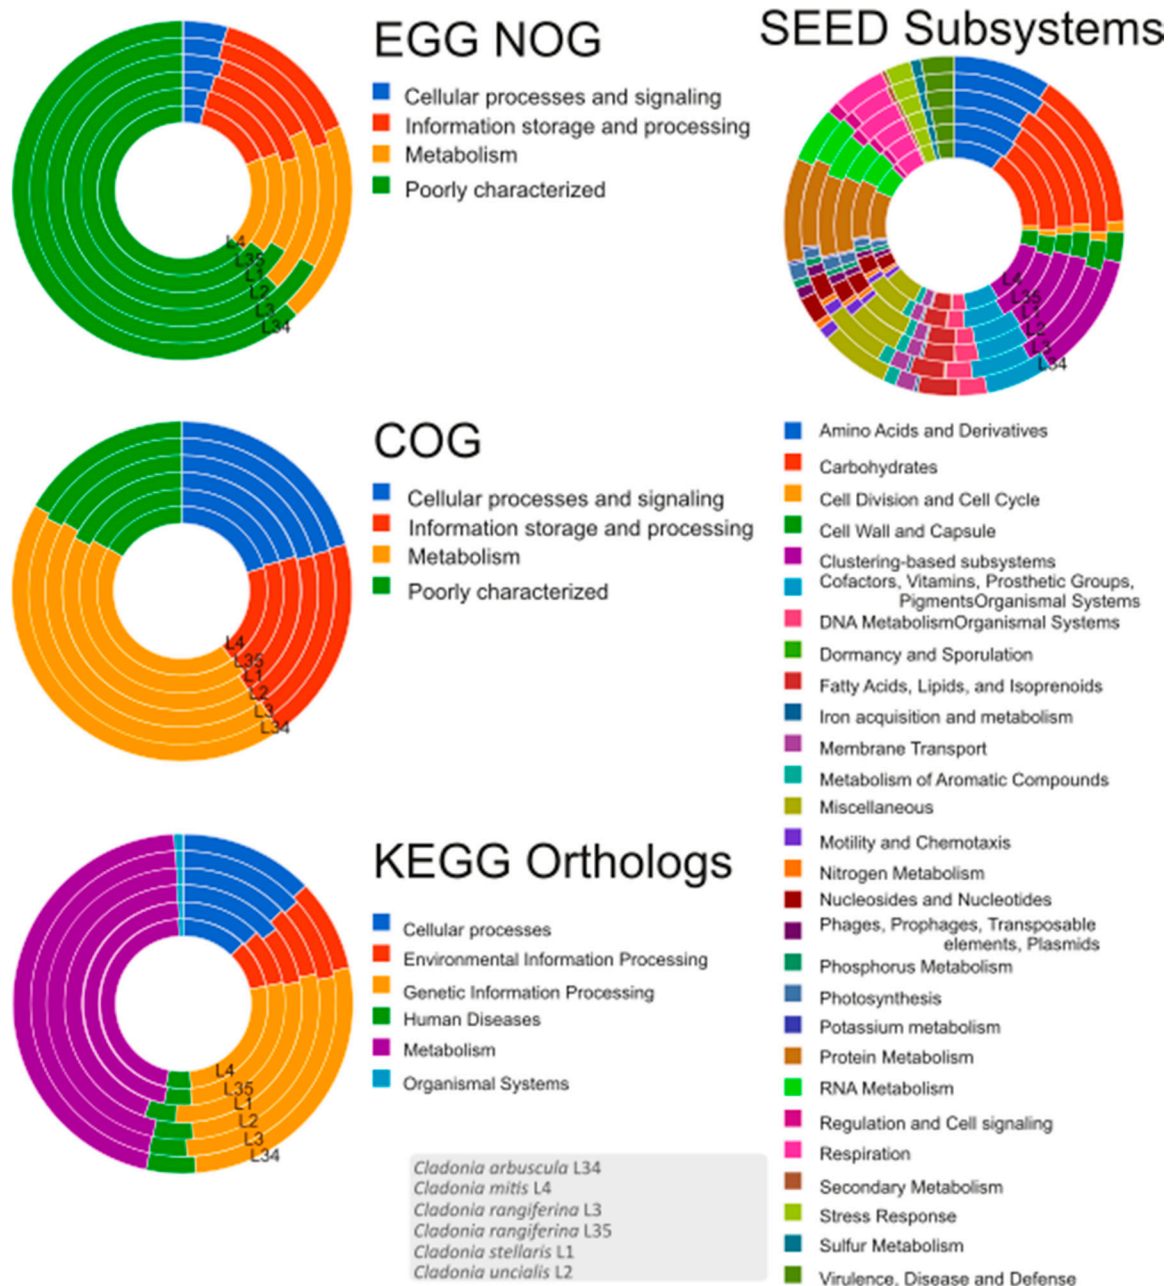

**Figure S9.** Functional assignment identified at the highest level using EGG NOG, COG, KEGG Orthologs and SEED sub-systems in the MG-RAST server. Sequences with assigned function represented 44 to 49% (L34 -44.22%, L35 -44.68%, L1 -46.21%, L2 -45.19%, L3 -49.21%, L4 -43.69%) of the total raw sequences submitted to MG-RAST.

Phylogenetic tree and genomic maps of *Cladonia* species. The tree on the left shows relationships between *Cladonia metacoralifera*, *Cladonia arbuscula*, *Cladonia mitis*, *Cladonia uncialis*, *Cladonia rangiferina*, and *Cladonia stellaris*. To the right, genomic maps for each species are shown, including node numbers, lengths, and coverage. For example, *Cladonia arbuscula* L34-NODE34 has a length of 83264 and coverage of 20X. *Cladonia rangiferina* L35-NODE281 has a length of 35525 and coverage of 21X. *Cladonia stellaris* L1-NODE189 has a length of 41944 and coverage of 20X.

**Figure S10.** Hybrids of biosynthetic gene clusters containing both NRPS and PKS biosynthetic genes. A. Heatmap based on presence/absence of the 20 largest NRPS-PKS hybrid gene cluster families from lichen metagenomes obtained in this study and in sequenced genomes of *Cladonia* fungi. B. Phylogenetic history of hybrid NRPS and PKS biosynthetic gene cluster (FAM\_00220) obtained during BiG-SCAPE/CORASON analysis. All metagenomes (L1-L34, in bold) and *Cladonia* genomes have similar core biosynthetic protein with the same order of domains and same substrate prediction for the adenylation (phenylalanine) and acyltransferase (malonyl CoA) domains.

### A. Presence/absence of Terpene

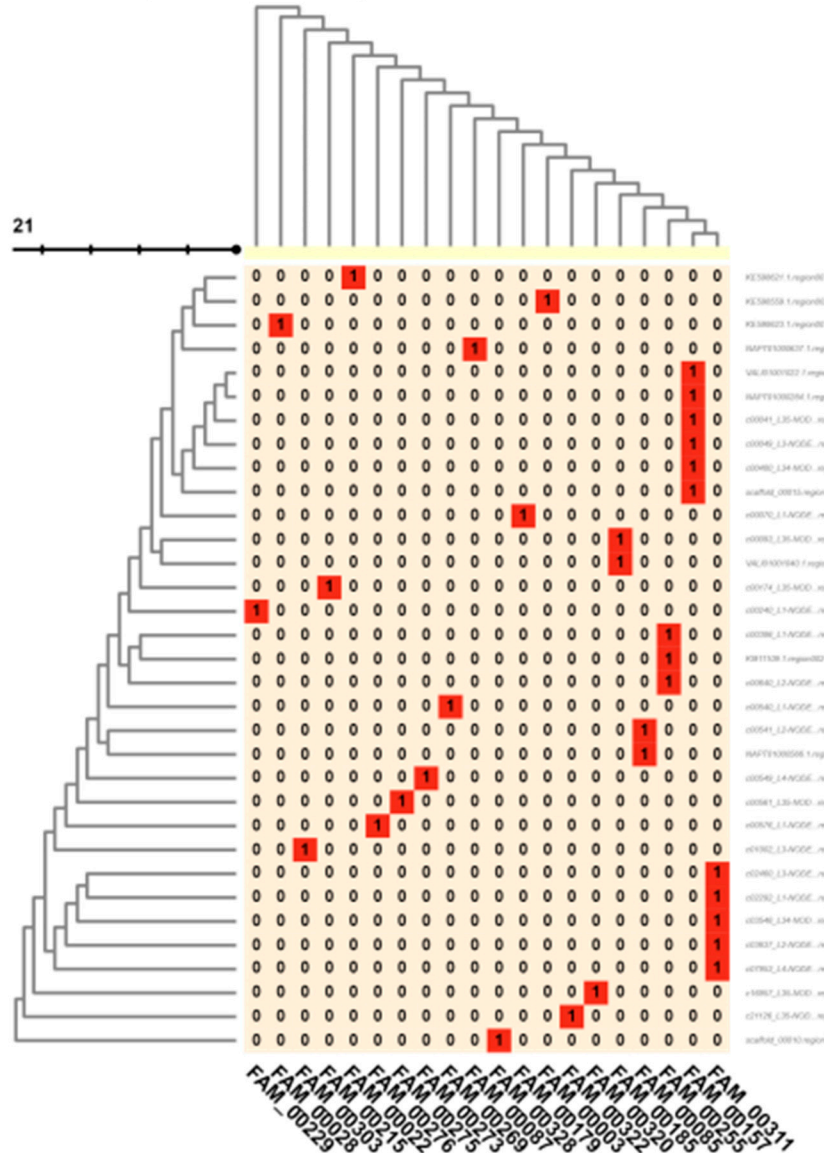

### B. Terpene (FAM00157) *Cladonia uncialis* Normore 8774 (NAPT01000284.1) NODE284\_length\_34689\_cov\_68X

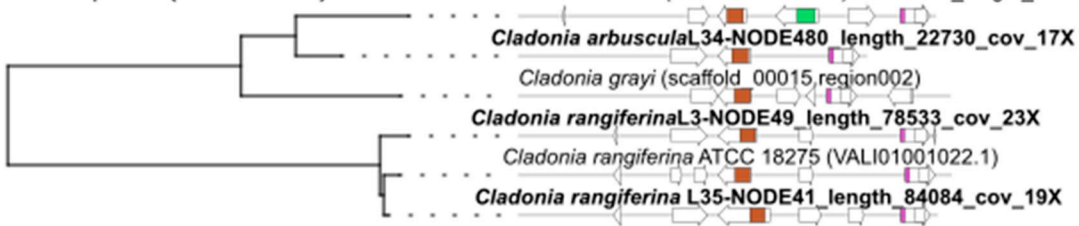

### C. Terpene (FAM00311)

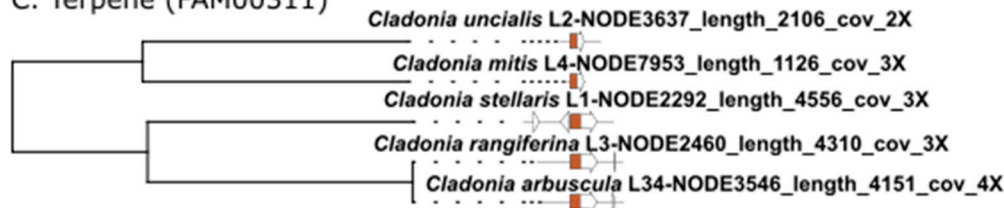

**Figure S11.** Biosynthetic gene clusters containing terpenes biosynthetic genes from metagenomes of studied strains and genomes of isolated *Cladonia* fungi. A. Heatmap based on presence/absence of the 20 largest Terpene families detected in the lichen metagenomes obtained in this study and in sequenced genomes of *Cladonia* species. Gene clusters families FAM00157 (B) and FAM00311 (C) detected in different *Cladonia* genomes/metagenomes using fungiSMASH and BiG-SCAPE/CORASON. Studied strains (data obtained from metagenomes) are highlighted in bold.



## A. Presence/absence of Type I PKS

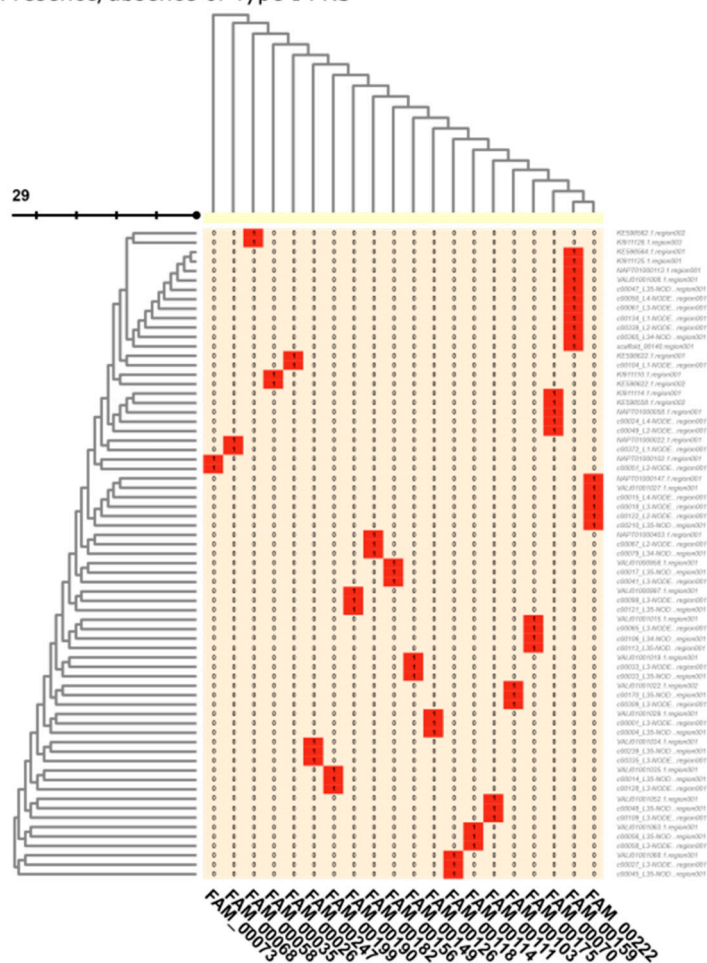

## B. FAM00159

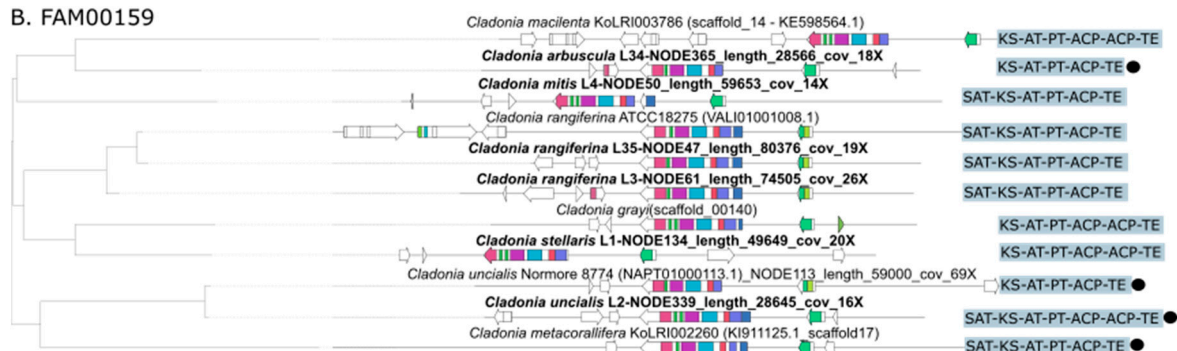

**Figure S12.** Type I PKS biosynthetic gene clusters. A. Heatmap based on presence/absence of the 20 largest Type I PKS families detected in the lichen metagenomes obtained in this study and in sequenced genomes of *Cladonia* fungi. B. Biosynthetic gene clusters containing PKS type I biosynthetic genes (FAM00159) detected in different *Cladonia* genomes/metagenomes. Studied strains (data obtained from metagenomes) are highlighted in bold. The prediction by fungiSMASH of *Cladonia* biosynthetic genes to be 100% similar to 1,3,6,8-tetrahydroxynaphthalene (MIBiG: BGC0001258) are indicated with a circle. Other samples returned with a similarity of 22% to naphthalene biosynthetic pathway (MIBiG: BGC0001906).

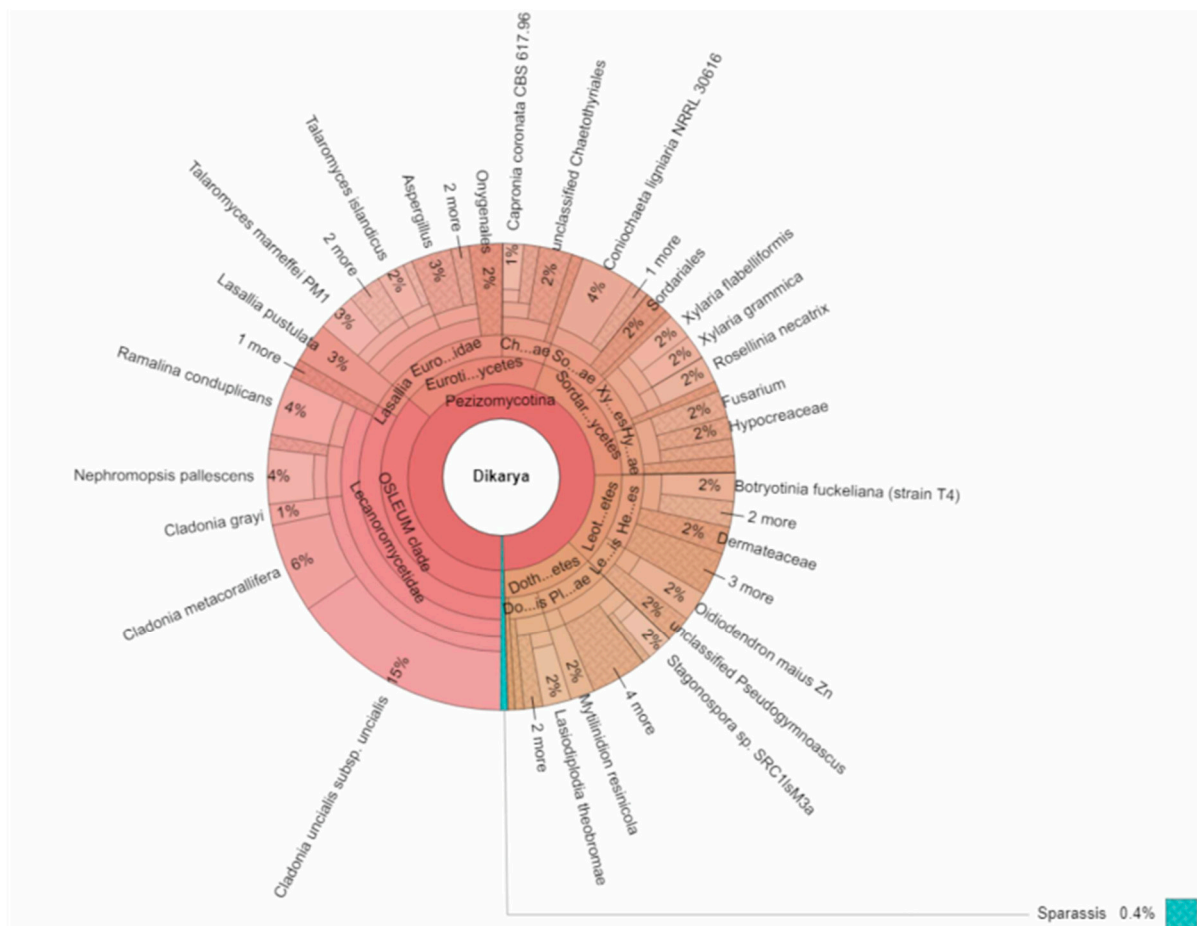

**Figure S13.** Taxonomic assignment based on Average Amino-acid Identity (AAI) values comparing 129 protein sequences predicted to be involved in the synthesis of PKS type I detected by fungiSMASH.

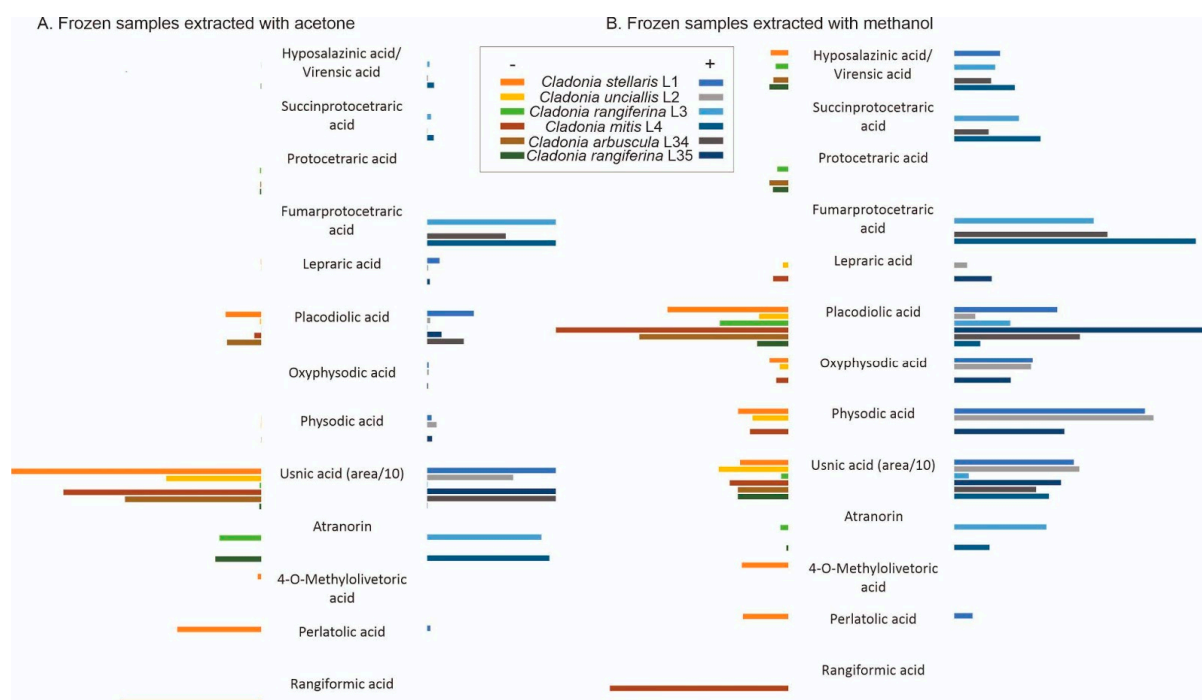

**Figure S14.** Relative amounts of the lichen secondary metabolites identified by ESI-Q-TOF mass spectrometric detection. Data were analyzed in positive and negative ion modes after compound separation by UPLC from frozen lichen samples extracted using either acetone (A) or methanol (B). Visualized data are derived from Supplementary Table S8.

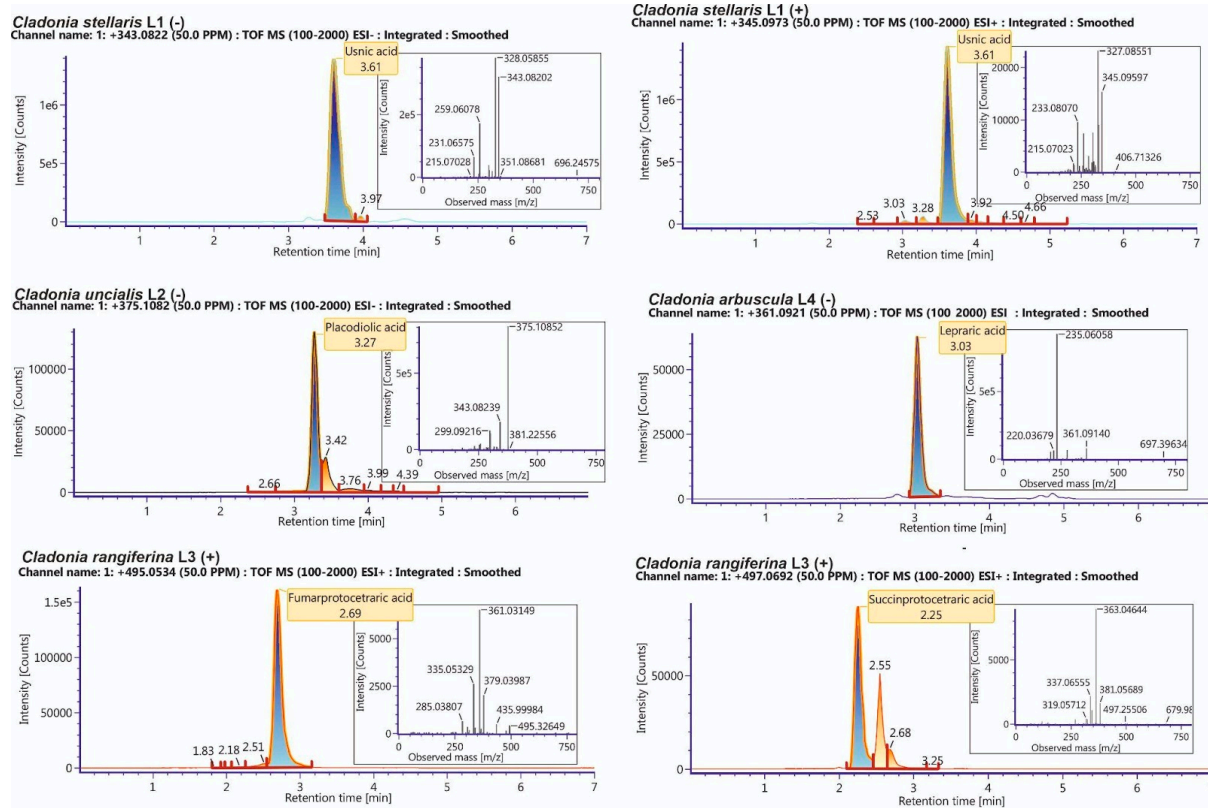

**Figure S15.** Examples of chromatograms and spectra indicating the lichen compounds detected in the studied samples. Mass spectrometric data was analyzed in positive (+) and negative (-) ion mode.



**Table S1.** Number of sequences assigned to green algae per sample.

| <b>Species</b>                    | <b>OTU</b> | <b>L1</b> | <b>L2</b> | <b>L3</b> | <b>L4</b> | <b>L34</b> | <b>L35</b> | <b>Total</b> |
|-----------------------------------|------------|-----------|-----------|-----------|-----------|------------|------------|--------------|
| <i>Asterochloris mediterranea</i> | Otu00003   | 34797     | 33283     | 32291     | 20075     | 29518      | 24318      | 174282       |
| <i>Trebouxia decolorans</i>       | Otu00008   | 371       | 113       | 783       | 118       | 43         | 3          | 1431         |
| <i>Trebouxia jamesii</i>          | Otu00010   | 32        | 16        | 19        | 21        | 296        | 969        | 1353         |
| <i>Trebouxia jamesii</i>          | Otu00011   | 293       | 483       | 172       | 114       | 27         | 23         | 1112         |
| <i>Trebouxia jamesii</i>          | Otu00016   | 14        | 7         | 7         | 10        | 171        | 429        | 638          |
| <i>Trebouxia jamesii</i>          | Otu00017   | 81        | 124       | 44        | 57        | 317        | 10         | 633          |
| <i>Trebouxia decolorans</i>       | Otu00019   | 275       | 106       | 57        | 133       | 19         | 1          | 591          |
| <i>Trebouxia decolorans</i>       | Otu00030   | 48        | 51        | 38        | 39        | 31         | 2          | 209          |
| <i>Trebouxia jamesii</i>          | Otu00031   | 80        | 62        | 38        | 21        | 0          | 0          | 201          |
| <i>Trebouxia jamesii</i>          | Otu00034   | 35        | 47        | 47        | 28        | 5          | 5          | 167          |
| <i>Trebouxia jamesii</i>          | Otu00051   | 20        | 13        | 14        | 16        | 28         | 0          | 91           |
| <i>Trebouxia jamesii</i>          | Otu00064   | 23        | 23        | 12        | 7         | 0          | 0          | 65           |
| <i>Trebouxia decolorans</i>       | Otu00068   | 27        | 14        | 8         | 8         | 1          | 1          | 59           |

**Table S2.** Relative amount of reads from ITS2 amplicon OTU analysis which were classified to species of *Cladonia* and other classifications. Relative abundance of reads above 50 % for each lichen specimen are highlighted in the table.

| Relative amount (%)                                           | L1    | L2    | L3    | L4    | L34   | L35   |
|---------------------------------------------------------------|-------|-------|-------|-------|-------|-------|
| <i>Cladonia rangiferina</i> subsp <i>rangiferina</i> OTU00001 | 0,00  | 0,00  | 75,07 | 0,15  | 0,00  | 81,23 |
| <i>Cladonia arbuscula</i> OTU00002                            | 0,00  | 0,00  | 0,31  | 82,91 | 75,17 | 1,64  |
| <i>Cladonia uncialis</i> subsp <i>biuncialis</i> OTU00004     | 0,00  | 79,70 | 0,00  | 0,09  | 0,00  | 0,00  |
| <i>Cladonia stellaris</i> OTU00005                            | 78,94 | 0,00  | 0,00  | 0,01  | 0,00  | 0,00  |
| Unclassified                                                  | 2,49  | 1,66  | 0,89  | 0,67  | 0,63  | 0,67  |
| Other                                                         | 18,27 | 17,98 | 23,36 | 15,91 | 23,81 | 16,00 |
| Rare OTU (<50 reads per OTU)                                  | 0,29  | 0,64  | 0,36  | 0,26  | 0,38  | 0,45  |

**Table S3.** Summary of the quality assessment of the studied sequences calculated using QUAST using the genome of *Cladonia rangiferina* ATCC 18275 (ASM614605v1) as reference.

|                            | new.contigs_L1 | new.contigs_L2 | new.contigs_L3 | new.contigs_L4 | new.contigs_L34 | new.contigs_L35 |
|----------------------------|----------------|----------------|----------------|----------------|-----------------|-----------------|
| # contigs (>= 0 bp)        | 100526         | 131864         | 126771         | 116310         | 153379          | 159796          |
| # contigs (>= 1000 bp)     | 20102          | 16513          | 20835          | 10331          | 20597           | 21226           |
| # contigs (>= 5000 bp)     | 1968           | 1289           | 1892           | 1459           | 2534            | 2192            |
| # contigs (>= 10000 bp)    | 921            | 924            | 890            | 1014           | 985             | 887             |
| # contigs (>= 25000 bp)    | 413            | 405            | 438            | 390            | 427             | 430             |
| # contigs (>= 50000 bp)    | 130            | 138            | 159            | 87             | 144             | 157             |
| Total length (>= 0 bp)     | 100838840      | 100203797      | 111939391      | 84030123       | 125533981       | 127848409       |
| Total length (>= 1000 bp)  | 71152244       | 54508614       | 73472126       | 42995763       | 77586544        | 76471750        |
| Total length (>= 5000 bp)  | 33916435       | 30312139       | 35307578       | 29837639       | 39581743        | 37290339        |
| Total length (>= 10000 bp) | 27102029       | 27685055       | 28803504       | 26549490       | 29341120        | 28766078        |
| Total length (>= 25000 bp) | 19023593       | 19147181       | 21458724       | 16345530       | 20380765        | 21469387        |
| Total length (>= 50000 bp) | 9033646        | 9960752        | 11703313       | 5846122        | 10439480        | 11771241        |
| # contigs                  | 35847          | 45212          | 40205          | 34739          | 43712           | 48298           |
| Largest contig             | 138857         | 154269         | 158143         | 147081         | 176544          | 184648          |
| Total length               | 82094879       | 74420864       | 86876711       | 59735367       | 93106593        | 94724226        |
| Reference length           | 35673945       | 35673945       | 35673945       | 35673945       | 35673945        | 35673945        |
| GC (%)                     | 54.28          | 53.64          | 54.50          | 52.87          | 54.28           | 54.27           |
| Reference GC (%)           | 45.44          | 45.44          | 45.44          | 45.44          | 45.44           | 45.44           |
| N50                        | 3501           | 2059           | 3362           | 4902           | 3774            | 3275            |
| NG50                       | 27372          | 27729          | 32474          | 22619          | 30651           | 33800           |
| N75                        | 1599           | 955            | 1460           | 920            | 1482            | 1293            |
| NG75                       | 10527          | 11564          | 14190          | 9725           | 13907           | 13440           |
| L50                        | 3705           | 3812           | 3918           | 1466           | 4147            | 4729            |
| LG50                       | 368            | 355            | 312            | 453            | 335             | 304             |
| L75                        | 12538          | 17852          | 13956          | 12215          | 14207           | 16434           |
| LG75                       | 888            | 838            | 718            | 1035           | 763             | 716             |
| # N's per 100 kbp          | 0.00           | 0.00           | 0.00           | 0.00           | 0.00            | 0.00            |
| NGA50                      | -              | -              | -              | -              | -               | -               |

All statistics are based on contigs of size >= 500 bp, unless otherwise noted (e.g., "# contigs (>= 0 bp)" and "Total length (>= 0 bp)" include all contigs).

**Table S4.** Summary of the quality assessment of the studied sequences calculated using MetaQUAST. The combined genome reference consisted of: *Acetobacter tropicalis*, *Acidiphilium multivorum* AIU301, *Acidocella* sp. MX AZ02, *Algisphaera agarilytica*, *Anabaena variabilis* ATCC 29413, *Aquisphaera giovannonii*, *Bradyrhizobium japonicum*, *Brevundimonas nasdae*, *Caulobacter vibrioides*, *Chlorella sorokiniana*, *Chthoniobacter flavus*, *Gluconacetobacter diazotrophicus* PA1 5, *Gluconacetobacter liquefaciens*, *Gluconacetobacter takamatsuzukensis*, *Granulibacter bethesdensis* CGDNIH4, *Kamptanema formosum* PCC 6407, *Komagataeibacter kakiaceti*, *Kozakia baliensis*, *Methylobacterium soli*, *Methylocystis heyeri*, *Phormidium* sp. CENA135, *Rhodoblastus sphagnicola*, *Rhodospila globiformis*, *Rhodovastum atsumiense*, *Singulisphaera acidiphila*, *Talaromyces rugulosus*.

|                            | new.contigs_L1 | new.contigs_L2 | new.contigs_L3 | new.contigs_L4 | new.contigs_L34 | new.contigs_L35 |
|----------------------------|----------------|----------------|----------------|----------------|-----------------|-----------------|
| # contigs (>= 0 bp)        | 100526         | 131864         | 126771         | 116310         | 153379          | 159796          |
| # contigs (>= 1000 bp)     | 20102          | 16513          | 20835          | 10331          | 20597           | 21226           |
| # contigs (>= 5000 bp)     | 1968           | 1289           | 1892           | 1459           | 2534            | 2192            |
| # contigs (>= 10000 bp)    | 921            | 924            | 890            | 1014           | 985             | 887             |
| # contigs (>= 25000 bp)    | 413            | 405            | 438            | 390            | 427             | 430             |
| # contigs (>= 50000 bp)    | 130            | 138            | 159            | 87             | 144             | 157             |
| Total length (>= 0 bp)     | 100838840      | 100203797      | 111939391      | 84030123       | 125533981       | 127848409       |
| Total length (>= 1000 bp)  | 71152244       | 54508614       | 73472126       | 42995763       | 77586544        | 76471750        |
| Total length (>= 5000 bp)  | 33916435       | 30312139       | 35307578       | 29837639       | 39581743        | 37290339        |
| Total length (>= 10000 bp) | 27102029       | 27685055       | 28803504       | 26549490       | 29341120        | 28766078        |
| Total length (>= 25000 bp) | 19023593       | 19147181       | 21458724       | 16345530       | 20380765        | 21469387        |
| Total length (>= 50000 bp) | 9033646        | 9960752        | 11703313       | 5846122        | 10439480        | 11771241        |
| # contigs                  | 35847          | 45212          | 40205          | 34739          | 43712           | 48298           |
| Largest contig             | 138857         | 154269         | 158143         | 147081         | 176544          | 184648          |
| Total length               | 82094879       | 74420864       | 86876711       | 59735367       | 93106593        | 94724226        |
| Reference length           | 227932695      | 227932695      | 227932695      | 227932695      | 227932695       | 227932695       |
| N50                        | 3501           | 2059           | 3362           | 4902           | 3774            | 3275            |
| N75                        | 1599           | 955            | 1460           | 920            | 1482            | 1293            |
| L50                        | 3705           | 3812           | 3918           | 1466           | 4147            | 4729            |
| L75                        | 12538          | 17852          | 13956          | 12215          | 14207           | 16434           |
| # N's per 100 kbp          | 0.00           | 0.00           | 0.00           | 0.00           | 0.00            | 0.00            |

All statistics are based on contigs of size >= 500 bp, unless otherwise noted (e.g., "# contigs (>= 0 bp)" and "Total length (>= 0 bp)" include all contigs).

**Table S5.** Sequenced metagenomes generated in this study. \*Raw sequences are available under accession number PRJEB34718. \*\*Compounds described in Figure 4 and Supplementary Figure S14.

| Species and strain              | Sequencer           | Assembler     | Assembled meta-genome (Mbp) | Genome coverage | Number of contigs | Accession number | Metabolites |
|---------------------------------|---------------------|---------------|-----------------------------|-----------------|-------------------|------------------|-------------|
| Metagenomes                     |                     |               |                             |                 |                   |                  |             |
| <i>Cladonia arbuscula</i> L34   | Illumina NextSeq500 | SPAdes 3.12.0 | 93                          | -               | 19649             | *                | **          |
| <i>Cladonia mitis</i> L4        | Illumina NextSeq500 | SPAdes 3.12.0 | 59                          | -               | 11760             | *                | **          |
| <i>Cladonia rangiferina</i> L3  | Illumina NextSeq500 | SPAdes 3.12.0 | 86                          | -               | 20256             | *                | **          |
| <i>Cladonia rangiferina</i> L35 | Illumina NextSeq500 | SPAdes 3.12.0 | 94                          | -               | 20592             | *                | **          |
| <i>Cladonia stellaris</i> L1    | Illumina NextSeq500 | SPAdes 3.12.0 | 82                          | -               | 19362             | *                | **          |
| <i>Cladonia uncialis</i> L2     | Illumina NextSeq500 | SPAdes 3.12.0 | 74                          | -               | 17633             | *                | **          |

**Table S6.** Published genomes of *Cladonia* included in the bioinformatic analyses.

| Genomes                                       | Sequencer           | Assembler          | Assembled genome (Mbp) | Genome coverage | Number of contigs | Accession number                         | Metabolites                                                            | Reference                                      |
|-----------------------------------------------|---------------------|--------------------|------------------------|-----------------|-------------------|------------------------------------------|------------------------------------------------------------------------|------------------------------------------------|
| <i>Cladonia grayi</i>                         | 454 and Solexa gDNA | Velvet and Newbler | 34.62                  | 15x             | 414               | <i>Cladonia grayi</i> Cgr/DA2myc/ss v1.0 | Grayanic acid, fumarprotocetraric acid                                 | Armaleo et al. 2019, Calchera et al. 2019      |
| <i>Cladonia macilenta</i> KoLRI003786         | Illumina HiSeq2000  | SOAPdenovo         | 37.11                  | 540x            | 240               | AUPP000000000                            | Thamnolic, barbatic, didymic, squamatic, usnic and rhodocladonic acids | Park et al. 2013, Calchera et al. 2019         |
| <i>Cladonia metacorrallifera</i> KoLRI002260* | Illumina HiSeq2000  | Allpaths-LG        | 36.68                  | 1023x           | 30                | AXCT000000000                            | Usnic, didymic, squamatic and rhodocladonic acids                      | Park et al. 2014, Calchera et al. 2019         |
| <i>Cladonia rangiferina</i> ATCC 18275        | Illumina MiSeq      | ABYSS v. AUG-2016  | 35.6                   | 1,567           | 8                 | ASM614605v1                              | -                                                                      | ASM614605v1                                    |
| <i>Cladonia uncialis</i> Normore8774          | Illumina MiSeq      | SPAdes v. 3.11     | 32.85                  | 43x             | 2124              | ASM292778v1                              | Usnic and squamatic acids                                              | Abdel-Hameed et al. 2016, Calchera et al. 2019 |

**Table S7.** Summary of biosynthetic gene cluster types found using bacterial antiSMASH at standalone for metagenomic data (\*\_anti) and fungal antiSMASH at web (\*\_fungi).

| Sample                                      | T1PK<br>S | T3PK<br>S | Ter-<br>pen<br>e | NRP<br>S | NRPS-<br>T1PK<br>S | T3PKS<br>-<br>T1PKS | In-<br>dol<br>e | hy-<br>brid/T1PKS<br>- indole/ter-<br>pene/<br>other | Si-<br>dero-<br>phor<br>e | Othe<br>r | Ar-<br>ylpoly<br>ene/<br>lasso-<br>pep-<br>tide/<br>bacte-<br>riocin/<br>thio-<br>pep-<br>tide/<br>beta-<br>lac-<br>tone | To<br>tal |
|---------------------------------------------|-----------|-----------|------------------|----------|--------------------|---------------------|-----------------|------------------------------------------------------|---------------------------|-----------|--------------------------------------------------------------------------------------------------------------------------|-----------|
| <b>Metagenomes</b>                          |           |           |                  |          |                    |                     |                 |                                                      |                           |           |                                                                                                                          |           |
| <i>Cladonia arbuscula</i><br>L34_fungi      | 20        | 2         | 3                | 7        | 3                  | 0                   | 2               | 1                                                    | 0                         | 0         | 0                                                                                                                        | 38        |
| <i>Cladonia arbuscula</i><br>L34_anti       | 16        | 3         | 5                | 12       | 4                  | 0                   | 3               | 1                                                    | 0                         | 1         | 1                                                                                                                        | 46        |
| <i>Cladonia mitis</i><br>L4_fungi           | 28        | 2         | 2                | 5        | 2                  | 0                   | 0               | 1                                                    | 1                         | 0         | 0                                                                                                                        | 41        |
| <i>Cladonia mitis</i><br>L4_anti            | 20        | 4         | 5                | 16       | 2                  | 0                   | 1               | 0                                                    | 1                         | 1         | 0                                                                                                                        | 50        |
| <i>Cladonia rangifer-<br/>ina</i> L3_fungi  | 19        | 1         | 4                | 6        | 3                  | 1                   | 0               | 0                                                    | 0                         | 0         | 0                                                                                                                        | 34        |
| <i>Cladonia rangifer-<br/>ina</i> L3_anti   | 18        | 4         | 6                | 14       | 1                  | 0                   | 0               | 1                                                    | 1                         | 1         | 1                                                                                                                        | 47        |
| <i>Cladonia rangifer-<br/>ina</i> L35_fungi | 17        | 1         | 6                | 4        | 2                  | 1                   | 0               | 1                                                    | 0                         | 0         | 0                                                                                                                        | 32        |
| <i>Cladonia rangifer-<br/>ina</i> L35_anti  | 17        | 3         | 9                | 14       | 1                  | 0                   | 0               | 0                                                    | 1                         | 1         | 1                                                                                                                        | 47        |
| <i>Cladonia stellaris</i><br>L1_fungi       | 12        | 0         | 6                | 5        | 4                  | 1                   | 0               | 2                                                    | 0                         | 1         | 0                                                                                                                        | 31        |
| <i>Cladonia stellaris</i><br>L1_anti        | 16        | 4         | 6                | 12       | 3                  | 0                   | 1               | 1                                                    | 0                         | 2         | 1                                                                                                                        | 46        |
| <i>Cladonia uncialis</i><br>L2_fungi        | 15        | 0         | 4                | 5        | 3                  | 1                   | 0               | 0                                                    | 0                         | 0         | 0                                                                                                                        | 28        |
| <i>Cladonia uncialis</i><br>L2_anti         | 16        | 2         | 7                | 14       | 1                  | 0                   | 1               | 0                                                    | 0                         | 0         | 1                                                                                                                        | 42        |
| <b>Genomes</b>                              |           |           |                  |          |                    |                     |                 |                                                      |                           |           |                                                                                                                          |           |
| <i>Cladonia grayi</i><br>_fungi             | 12        | 0         | 2                | 9        | 1                  | 0                   | 0               | 0                                                    | 0                         | 1         | 0                                                                                                                        | 25        |
| <i>Cladonia grayi</i> _anti                 | 8         | 3         | 2                | 11       | 1                  | 0                   | 1               | 1                                                    | 0                         | 1         | 0                                                                                                                        | 28        |

|                                                                |    |   |   |    |   |   |   |   |   |   |   |    |
|----------------------------------------------------------------|----|---|---|----|---|---|---|---|---|---|---|----|
| <i>Cladonia macilenta</i><br>KoLRI003786_fung<br>i             | 18 | 0 | 3 | 6  | 3 | 1 | 0 | 0 | 0 | 0 | 0 | 31 |
| <i>Cladonia macilenta</i><br>KoLRI003786_anti                  | 17 | 2 | 4 | 12 | 3 | 0 | 0 | 0 | 0 | 1 | 0 | 39 |
| <i>Cladonia metacoral-<br/>lifera</i><br>KoLRI002260_fung<br>i | 19 | 0 | 5 | 8  | 1 | 1 | 0 | 1 | 0 | 1 | 0 | 36 |
| <i>Cladonia metacoral-<br/>lifera</i><br>KoLRI002260_anti      | 15 | 2 | 5 | 12 | 2 | 0 | 0 | 1 | 0 | 0 | 0 | 37 |
| <i>Cladonia rangifer-<br/>ina</i> ATCC 18275<br>_fungi         | 18 | 0 | 2 | 6  | 2 | 1 | 0 | 1 | 0 | 0 | 0 | 30 |
| <i>Cladonia rangifer-<br/>ina</i> ATCC 18275<br>_anti          | 16 | 3 | 2 | 15 | 1 | 0 | 0 | 2 | 1 | 1 | 1 | 42 |
| <i>Cladonia uncialis</i><br>Normore8774_fungi                  | 14 | 0 | 3 | 2  | 3 | 1 | 0 | 0 | 0 | 0 | 0 | 23 |
| <i>Cladonia uncialis</i><br>Normore8774_anti                   | 18 | 2 | 4 | 11 | 1 | 0 | 1 | 0 | 0 | 1 | 0 | 38 |

---

**Table S8.** Compounds detected in lichen acetone (Ac) or methanol (Me) extracts from samples kept at room temperature or frozen, List 1: Unicellular fungi and green algae sequences added to the UNITE library, List 2: Compounds screened using the software UNIFI scientific information system (Waters).

**List 1.** Unicellular fungi and green algae sequences added to the UNITE library.

KU948729

k\_Fungi;p\_Basidiomycota;c\_Cystobasidiomycetes;o\_Cyphobasidiales;f\_Cyphobasidiaceae;g\_Uncultured\_Cyphobasidiales;s\_Uncultured\_Cyphobasidiales;

KU948734

k\_Fungi;p\_Basidiomycota;c\_Cystobasidiomycetes;o\_Cyphobasidiales;f\_Cyphobasidiaceae;g\_Uncultured\_Cyphobasidiales;s\_Uncultured\_Cyphobasidiales;

KU948735

k\_Fungi;p\_Basidiomycota;c\_Cystobasidiomycetes;o\_Uncultured\_Cystobasidiomycetes;f\_Uncultured\_Cystobasidiomycetes;g\_Uncultured\_Cystobasidiomycetes;s\_Uncultured\_Cystobasidiomycetes;

KU948736

k\_Fungi;p\_Basidiomycota;c\_Cystobasidiomycetes;o\_Cyphobasidiales;f\_Cyphobasidiaceae;g\_Uncultured\_Cyphobasidiales;s\_Uncultured\_Cyphobasidiales;

KU948741

k\_Fungi;p\_Basidiomycota;c\_Cystobasidiomycetes;o\_Uncultured\_Cystobasidiomycetes;f\_Uncultured\_Cystobasidiomycetes;g\_Uncultured\_Cystobasidiomycetes;s\_Uncultured\_Cystobasidiomycetes;

KU948742

k\_Fungi;p\_Basidiomycota;c\_Cystobasidiomycetes;o\_Cyphobasidiales;f\_Cyphobasidiaceae;g\_Uncultured\_Cyphobasidiales;s\_Uncultured\_Cyphobasidiales;

KU948743

k\_Fungi;p\_Basidiomycota;c\_Cystobasidiomycetes;o\_Cyphobasidiales;f\_Cyphobasidiaceae;g\_Uncultured\_Cyphobasidiales;s\_Uncultured\_Cyphobasidiales;

KU948744

k\_Fungi;p\_Basidiomycota;c\_Cystobasidiomycetes;o\_Cyphobasidiales;f\_Cyphobasidiaceae;g\_Uncultured\_Cyphobasidiales;s\_Uncultured\_Cyphobasidiales;

KU948745 k\_Fungi;p\_Basidiomycota;c\_Cystobasidiomycetes;o\_Cyphobasidiales;f\_Cyphobasidiaceae;g\_Uncultured\_Cyphobasidiales;s\_Uncultured\_Cyphobasidiales;

KU948746

k\_Fungi;p\_Basidiomycota;c\_Cystobasidiomycetes;o\_Uncultured\_Cystobasidiomycetes;f\_Uncultured\_Cystobasidiomycetes;g\_Uncultured\_Cystobasidiomycetes;s\_Uncultured\_Cystobasidiomycetes;

KU948747

k\_Fungi;p\_Basidiomycota;c\_Cystobasidiomycetes;o\_Uncultured\_Cystobasidiomycetes;f\_Uncultured\_Cystobasidiomycetes;g\_Uncultured\_Cystobasidiomycetes;s\_Uncultured\_Cystobasidiomycetes;

KU948751

k\_Fungi;p\_Basidiomycota;c\_Cystobasidiomycetes;o\_Cyphobasidiales;f\_Cyphobasidiaceae;g\_Uncultured\_Cyphobasidiales;s\_Uncultured\_Cyphobasidiales;

KU948753

k\_Fungi;p\_Basidiomycota;c\_Cystobasidiomycetes;o\_Cyphobasidiales;f\_Cyphobasidiaceae;g\_Uncultured\_Cyphobasidiales;s\_Uncultured\_Cyphobasidiales;

KU948755

k\_Fungi;p\_Basidiomycota;c\_Cystobasidiomycetes;o\_Cyphobasidiales;f\_Cyphobasidiaceae;g\_Uncultured\_Cyphobasidiales;s\_Uncultured\_Cyphobasidiales;

KU948756

k\_Fungi;p\_Basidiomycota;c\_Cystobasidiomycetes;o\_Cyphobasidiales;f\_Cyphobasidiaceae;g\_Uncultured\_Cyphobasidiales;s\_Uncultured\_Cyphobasidiales;

KU948760

k\_Fungi;p\_Basidiomycota;c\_Cystobasidiomycetes;o\_Cyphobasidiales;f\_Cyphobasidiaceae;g\_Uncultured\_Cyphobasidiales;s\_Uncultured\_Cyphobasidiales;

KU948763

k\_Fungi;p\_Basidiomycota;c\_Cystobasidiomycetes;o\_Cyphobasidiales;f\_Cyphobasidiaceae;g\_Uncultured\_Cyphobasidiales;s\_Uncultured\_Cyphobasidiales;

KU948764

k\_Fungi;p\_Basidiomycota;c\_Cystobasidiomycetes;o\_Cyphobasidiales;f\_Cyphobasidiaceae;g\_Uncultured\_Cyphobasidiales;s\_Uncultured\_Cyphobasidiales;

KU948765

k\_Fungi;p\_Basidiomycota;c\_Cystobasidiomycetes;o\_Uncultured\_Cystobasidiomycetes;f\_Uncultured\_Cystobasidiomycetes;g\_Uncultured\_Cystobasidiomycetes;s\_Uncultured\_Cystobasidiomycetes;  
 KU948768  
 k\_Fungi;p\_Basidiomycota;c\_Cystobasidiomycetes;o\_Cyphobasidiales;f\_Cyphobasidiaceae;g\_Uncultured\_Cyphobasidiales;s\_Uncultured\_Cyphobasidiales;  
 KU948772  
 k\_Fungi;p\_Basidiomycota;c\_Cystobasidiomycetes;o\_Cyphobasidiales;f\_Cyphobasidiaceae;g\_Uncultured\_Cyphobasidiales;s\_Uncultured\_Cyphobasidiales;  
 KU948774  
 k\_Fungi;p\_Basidiomycota;c\_Cystobasidiomycetes;o\_Cyphobasidiales;f\_Cyphobasidiaceae;g\_Uncultured\_Cyphobasidiales;s\_Uncultured\_Cyphobasidiales;  
 KU948775  
 k\_Fungi;p\_Basidiomycota;c\_Cystobasidiomycetes;o\_Cyphobasidiales;f\_Cyphobasidiaceae;g\_Uncultured\_Cyphobasidiales;s\_Uncultured\_Cyphobasidiales;  
 KU948776  
 k\_Fungi;p\_Basidiomycota;c\_Cystobasidiomycetes;o\_Cyphobasidiales;f\_Cyphobasidiaceae;g\_Uncultured\_Cyphobasidiales;s\_Uncultured\_Cyphobasidiales;  
 KU948778  
 k\_Fungi;p\_Basidiomycota;c\_Cystobasidiomycetes;o\_Cyphobasidiales;f\_Cyphobasidiaceae;g\_Uncultured\_Cyphobasidiales;s\_Uncultured\_Cyphobasidiales;  
 KU948779  
 k\_Fungi;p\_Basidiomycota;c\_Cystobasidiomycetes;o\_Uncultured\_Cystobasidiomycetes;f\_Uncultured\_Cystobasidiomycetes;g\_Uncultured\_Cystobasidiomycetes;s\_Uncultured\_Cystobasidiomycetes;  
 KU948780  
 k\_Fungi;p\_Basidiomycota;c\_Cystobasidiomycetes;o\_Cyphobasidiales;f\_Cyphobasidiaceae;g\_Uncultured\_Cyphobasidiales;s\_Uncultured\_Cyphobasidiales;  
 KU948784  
 k\_Fungi;p\_Basidiomycota;c\_Cystobasidiomycetes;o\_Cyphobasidiales;f\_Cyphobasidiaceae;g\_Uncultured\_Cyphobasidiales;s\_Uncultured\_Cyphobasidiales;  
 KU948785  
 k\_Fungi;p\_Basidiomycota;c\_Cystobasidiomycetes;o\_Cyphobasidiales;f\_Cyphobasidiaceae;g\_Uncultured\_Cyphobasidiales;s\_Uncultured\_Cyphobasidiales;  
 AB627405  
 k\_Plantae;p\_Chlorophyta;c\_Trebouxiophyceae;o\_Trebouxiales;f\_Trebouxiaceae;g\_Trebouxia;s\_Trebouxia\_corticola;  
 AB627375  
 k\_Plantae;p\_Chlorophyta;c\_Trebouxiophyceae;o\_Trebouxiales;f\_Trebouxiaceae;g\_Trebouxia;s\_Trebouxia\_corticola;  
 JF831923  
 k\_Plantae;p\_Chlorophyta;c\_Trebouxiophyceae;o\_Trebouxiales;f\_Trebouxiaceae;g\_Trebouxia;s\_Trebouxia\_decolorans;  
 FJ705205  
 k\_Plantae;p\_Chlorophyta;c\_Trebouxiophyceae;o\_Trebouxiales;f\_Trebouxiaceae;g\_Trebouxia;s\_Trebouxia\_decolorans;  
 FJ705184  
 k\_Plantae;p\_Chlorophyta;c\_Trebouxiophyceae;o\_Trebouxiales;f\_Trebouxiaceae;g\_Trebouxia;s\_Trebouxia\_decolorans;  
 JX036160  
 k\_Plantae;p\_Chlorophyta;c\_Trebouxiophyceae;o\_Trebouxiales;f\_Trebouxiaceae;g\_Trebouxia;s\_Uncultured\_Trebouxia;  
 KF907553  
 k\_Plantae;p\_Chlorophyta;c\_Trebouxiophyceae;o\_Trebouxiales;f\_Trebouxiaceae;g\_Trebouxia;s\_Trebouxia\_jamesii;  
 KT827678 k\_Plantae;p\_Chlorophyta;c\_Trebouxiophyceae;o\_Trebouxiales;f\_Trebouxiaceae;g\_Trebouxia;s\_Trebouxia\_jamesii;  
 KT827707  
 k\_Plantae;p\_Chlorophyta;c\_Trebouxiophyceae;o\_Trebouxiales;f\_Trebouxiaceae;g\_Trebouxia;s\_Trebouxia\_jamesii;  
 JX675737  
 k\_Plantae;p\_Chlorophyta;c\_Ulvophyceae;o\_Trentepohliales;f\_Trentepohliaceae;g\_Trentepohlia;s\_Trentepohlia\_iolithus;  
 JX675738  
 k\_Plantae;p\_Chlorophyta;c\_Ulvophyceae;o\_Trentepohliales;f\_Trentepohliaceae;g\_Trentepohlia;s\_Trentepohlia\_arborum;  
 JX675736  
 k\_Plantae;p\_Chlorophyta;c\_Ulvophyceae;o\_Trentepohliales;f\_Trentepohliaceae;g\_Trentepohlia;s\_Trentepohlia\_umbra;  
 JX675731  
 k\_Plantae;p\_Chlorophyta;c\_Ulvophyceae;o\_Trentepohliales;f\_Trentepohliaceae;g\_Trentepohlia;s\_Trentepohlia\_sp;  
 JQ617945  
 k\_Plantae;p\_Chlorophyta;c\_Ulvophyceae;o\_Trentepohliales;f\_Trentepohliaceae;g\_Trentepohlia;s\_Trentepohlia\_sp;



KC489149

k\_\_Plantae;p\_\_Chlorophyta;c\_\_Ulvophyceae;o\_\_Trentepohliales;f\_\_Trentepohliaceae;g\_\_Printzina;s\_\_Printzina\_cf\_lagenifera;  
KC489150

k\_\_Plantae;p\_\_Chlorophyta;c\_\_Ulvophyceae;o\_\_Trentepohliales;f\_\_Trentepohliaceae;g\_\_Printzina;s\_\_Printzina\_lagenifera;  
KC489134 k\_\_Plantae;p\_\_Chlorophyta;c\_\_Ulvophyceae;o\_\_Trentepohliales;f\_\_Trentepohl-  
iaceae;g\_\_Printzina;s\_\_Printzina\_sp;

KY559106

k\_\_Plantae;p\_\_Chlorophyta;c\_\_Trebouxiophyceae;o\_\_Trebouxiales;f\_\_Trebouxiaceae;g\_\_Asterochloris;s\_\_Asterochloris\_irregu-  
laris;

KP031547

k\_\_Plantae;p\_\_Chlorophyta;c\_\_Trebouxiophyceae;o\_\_Trebouxiales;f\_\_Trebouxiaceae;g\_\_Asterochloris;s\_\_Asterochlo-  
ris\_cf\_glomerata;

KP257384

k\_\_Plantae;p\_\_Chlorophyta;c\_\_Trebouxiophyceae;o\_\_Trebouxiales;f\_\_Trebouxiaceae;g\_\_Asterochloris;s\_\_Asterochloris\_medi-  
terranea;

KP318674

k\_\_Plantae;p\_\_Chlorophyta;c\_\_Trebouxiophyceae;o\_\_Trebouxiales;f\_\_Trebouxiaceae;g\_\_Asterochloris;s\_\_Asterochloris\_lobo-  
phora;

KP318671

k\_\_Plantae;p\_\_Chlorophyta;c\_\_Trebouxiophyceae;o\_\_Trebouxiales;f\_\_Trebouxiaceae;g\_\_Asterochloris;s\_\_Asterochloris\_echi-  
nata;

KP318670

k\_\_Plantae;p\_\_Chlorophyta;c\_\_Trebouxiophyceae;o\_\_Trebouxiales;f\_\_Trebouxiaceae;g\_\_Asterochloris;s\_\_Asterochlo-  
ris\_friedlii;

KP318669

k\_\_Plantae;p\_\_Chlorophyta;c\_\_Trebouxiophyceae;o\_\_Trebouxiales;f\_\_Trebouxiaceae;g\_\_Asterochloris;s\_\_Asterochlo-  
ris\_woessiae;

KP318664

k\_\_Plantae;p\_\_Chlorophyta;c\_\_Trebouxiophyceae;o\_\_Trebouxiales;f\_\_Trebouxiaceae;g\_\_Asterochloris;s\_\_Asterochlo-  
ris\_gaertneri;

KY981701

k\_\_Plantae;p\_\_Chlorophyta;c\_\_Trebouxiophyceae;o\_\_Trebouxiales;f\_\_Trebouxiaceae;g\_\_Myrmecia;s\_\_Myrmecia\_israelensis;

KY981700

k\_\_Plantae;p\_\_Chlorophyta;c\_\_Trebouxiophyceae;o\_\_Trebouxiales;f\_\_Trebouxiaceae;g\_\_Myrmecia;s\_\_Myrmecia\_israelensis;

**List 2.** Compounds screened using the software UNIFI scientific information system (Waters):

1,3-Dihydro-4,6-dihydroxy-3-oxo-5-isobenzofurancarboxaldehyde  
1,7-Dibenzofurandicarboxylic acid, 3,9-dimethoxy-, dimethyl ester  
11H-Dibenzo[b,e][1,4]dioxepin-7-carboxylic acid, 3,8-dimethoxy-11-oxo-6-pentyl-1-valeryl-, methyl ester  
1-O-Methylfragilin  
2,4,5-Trichloro-1,3-dihydroxy-6-methoxy-8-methyl-9H-xanthen-9-one  
2,4,5-Trichlorolichexanthone  
2,4,7-Trichloro-3,8-dihydroxy-6-methoxy-1-methyl-9H-xanthen-9-one  
2,4-Dichlorolichexanthone  
2,4-Dichloronorlichexanthone  
2,4'-Di-O-methylnorsekikaic acid  
2,5,7-Trichlorolichexanthone  
2,5-Dichloro-3,8-dihydroxy-6-methoxy-1-methyl-9H-xanthen-9-one  
2,5-Dichlorolichexanthone  
2,5-Dichloronorlichexanthone  
2,7-Dichlorolichexanthone  
2,7-Dichloronorlichexanthone  
2-Chloro-1-hydroxy-3,6-dimethoxy-8-methyl-9H-xanthen-9-one  
2-Chloro-8-hydroxy-3,6-dimethoxy-1-methyl-9H-xanthen-9-one  
2-Chloronorlichexanthone  
2-Hydroxy-3-[(1-oxohexadecyl)oxy]propyl 6-deoxy-6-sulfo- $\alpha$ -D-glucopyranoside  
2-Hydroxychrysophanol  
2'-O-Methylanziaic acid  
2-O-Methylconfluentic acid  
2-O-Methyldivaricatic acid  
2'-O-Methylevernic acid  
2-O-Methylhiascic acid  
2'-O-Methylhyperphyllinic acid A  
2'-O-Methylhyperphyllinic acid B  
2'-O-Methylimbricaric acid  
2'-O-Methylmicrophyllinic acid  
2'-O-Methylperlatolic acid  
2-O-Methylperlatolic acid  
2'-O-Methylphysodic acid  
2-O-Methylsekikaic acid  
2-O-Methylstenosporic acid  
2''-O-Methyltenuiorin  
2'-O-Methyltenuiorin  
3,5-Dichloro-2'-O-methylanziaic acid  
3,5-Dichloro-2'-O-methylnorstenosporic acid  
3,5-Dichloro-4-O-demethylplanaic acid  
3,7-Dimethoxy-1,9-dibenzofurandicarboxylic acid  
3-O-Methylasemone  
3-Chlorodivaricatic acid  
3-O-Methylthiophanic acid  
4,4'-Disolorinic acid  
4,5-Dichloronorlichexanthone  
4,5-Di-O-methylhiascic acid  
4,7-Dichloronorlichexanthone  
4-O-Demethylglomellic acid  
4-O-Demethylloxodellic acid  
4-Chloro-1,6-dihydroxy-3-methoxy-8-methyl-9H-xanthen-9-one  
4-Chloronorlichexanthone  
4-Dechlorothiomelin  
4-Methoxyphthalic acid  
4-O-Demethylbarbatic acid  
4-O-Demethyldiffractaic acid  
4-O-Demethylglomelliferic acid  
4-O-Demethylimbricaric acid  
4-O-Demethylmicrophyllinic acid  
4-O-Demethylplanaic acid

4'-O-Demethylsekikaic acid  
4-O-Demethylsphaerophorin  
4-O-Demethylstenosporic acid  
4-O-Methylcryptochlorophaeic acid  
4-O-Methylcryptochloropheic acid  
4-O-Methylgyrophoric acid  
4-O-Methylisocryptochlorophaeic acid  
4-O-Methylolivetic acid  
4-O-Methylphysodic acid  
4-O-Methylsuperolivetic acid  
5,7-Dichloronorlichexanthone  
5,7-Dideoxyquercetin  
5-Chloro-2'-O-methylanziaic acid  
5-Chloroemodin  
5-Chlorovirensic acid  
5-O-Methylhiassic acid  
6,8,1'-Tri-O-methyl averantin  
6-O-Methylthiophanic acid  
6-Heptyl-3,8-dihydroxy-1-methyl-11-oxo-11H-dibenzo[b,e][1,4]dioxepin-7-carboxylic acid  
6-O-Methylaverantin  
6-O-Methylthiophanic acid  
7,7'-Dichlorohypericin  
7-Chloro-1,3-dihydroxy-6-methoxy-8-methylxanthone  
7-Chloro-1,6-di-O-methylemodin  
7-Chloro-1-O-methylemodin  
7-Chloroemodin  
7-Chlorolichexanthone  
7-Chloronorlichexanthone  
7H-Isobenzofuro[4,5-b][1,4]benzodioxepin-3,7(1H)-dione, 4,10-dimethoxy-5,8,11-trimethyl-  
7-O-Methylemodic acid  
8-O-Methylaverythin  
8-O-Methylthiomelin  
Alatinone  
Alectorialic acid  
Alectorialin  
Alectoronic acid  
Alectosarmentin  
alpha Acetyl hypoconstictic acid  
Amidepsine D  
Anthraquinone, 2-chloro-1,6,8-trihydroxy-3-methyl-  
Anziaic acid  
Aphthosin  
Apigenin  
Argopsin  
Arthoniaic acid  
Arthonin  
Arthothelin  
Asemone  
Aspicilin  
Atranorin  
Averantin  
Averythrin  
Azaleatin  
Baeomycesic acid  
Baicalein  
Barbatic acid  
Barbatolic acid  
Barbatolin  
Benzoic acid, 2-  
Benzoic acid, 2'-heptyl-4',6'-dihydroxy-4-methoxy-6-methyl-2,3'-oxydi-,  $\delta$ -lactone  
Benzoic acid, 2-heptyl-6-hydroxy-4-methoxy-, 4-carboxy-3-heptyl-5-methoxyphenyl ester  
Benzoic acid, 3-

Benzoic acid, 3-chloro-2-hydroxy-4-methoxy-6-pentyl-, 4-carboxy-3-hydroxy-5-pentylphenyl ester  
Boninic acid  
Buellolide  
Caloploicin  
Calycin  
Canarione  
Capillarisin  
Chloroatranorin  
Colensoic acid  
Coneuplectin  
Confluent acid  
Congrayanic acid  
Conloxodin  
Connorstictic acid  
Conorlobaridone  
Consalazinic acid  
Constictic acid  
Constipatic acid  
Contortin  
Crustinic acid  
Cryptochlorophaeic acid  
Cryptostictic acid  
Deacetyloccellin  
Decarboxythamnolic acid  
Dechlorodiploicin  
Demethylchodatin  
Demethylpsoromic acid  
Deoxyerythrolaccin  
Diacetylgraciliformin  
Didymic acid  
Diffractaic acid  
Diploicin  
Diploschistesic acid  
Divaricatic acid  
Echinocarpic acid  
Emodic acid  
Emodin  
Endocrocin  
Epanorin  
Epiphorellic acid 1  
Epiphorellic acid 2  
Eriodermin  
Erythrin  
Erythroglaucin  
Ethyl everminate  
Ethyl haematommate  
Eugenitin  
Eugenitol  
Eumitrin A1  
Eupafolin  
Euplectin  
Evernic acid  
Evernin  
Everninic acid  
Fallacinal  
Ferulic acid  
Flavipin  
Fragilin  
Fumarprotocetraric acid  
Funiculosin  
Fusarubin  
Galangin

Galbinic acid  
Gangaleoidin  
Genistein  
Glaucophaeic acid  
Glomellic acid  
Glomelliferic acid  
Glomelliferonic acid  
Glomellonic acid  
Grayanic acid  
Gyrophoric acid  
Haematommone  
Hematommic acid  
Hiascic acid  
Homosekikaic acid  
Hydroxyemodin  
Hyperconfluentic acid  
Hyperhomosekikaic acid  
Hyperlatolic acid  
Hypoconstictic acid  
Hypoprotocetraric acid  
Hyposalazinic acid  
Hypostictic acid  
Hypothallin  
Hypothamnolic acid  
Imbricaric acid  
Insignin  
Isoarthothelin  
Isohematommic acid  
Isohyperlatolic acid  
Isonotatic acid  
Isoobtusatic acid  
Isophysodic acid  
Isorhamnetin  
Isosubpicrolichenic acid  
Isousnic acid  
Isovicanicin  
Lanosterol  
Lasallic acid  
Lecanoric acid  
Lecideoidin  
Leoidin  
Leprapinic acid  
Lepraric acid  
Leprolomin  
Lichexanthone  
Lividic acid  
Lobaric acid  
Loxodellic acid  
Loxodin  
Lucidin  
Lusitanic acid  
Malonprotocetraric acid  
Melacarpic acid  
Menegazziaic acid  
Merochlorophaeic acid  
Methyl 2-O-methyllecanorate  
Methyl 3,5-dichlorolecanorate  
Methyl 4-O-demethylbarbatate  
Methyl barbatate  
Methyl evernate  
Methyl gyrophorate  
Methyl haematommate

Methyl lecanorate  
Methyl olivetolate  
Methyl orsellinate  
Methyl  $\beta$ -orsellinate  
Miriquidic acid  
Montagnetol  
Moretenone  
Morindone  
m-Scrobiculin  
m-Scrobiculin  
Neosartorin  
Nephroarctin  
Neuropogonin A  
Norcolensoic acid  
Nordivaricatic acid  
Norgangaleoidin  
Norlichexanthone  
Norlobaric acid  
Norlobaridone  
Norlobariol  
Normiriquidic acid  
Nornotatic acid  
Norperistictic acid  
Norsolorinic acid  
Norstictic acid  
Norwogonin  
Notatic acid  
Obtusatic acid  
Olivetolic acid  
Olivetoric acid  
O-Methylhypoprotocetraric acid  
Orsellinic acid  
Ovoic acid  
Oxyphysodic acid  
Paludosic acid  
Pannaric acid  
Pannaric acid 2-methyl ester  
Pannaric acid 6-methyl ester  
Pannarin  
Parietin  
Parietinic acid  
Pedalitin  
Perlatolic acid  
Phenarctin  
Physodalic acid  
Physodic acid  
Picrolichenic acid  
Pinastric acid  
Placodiolic acid  
Planaic acid  
Porphyrilin  
Porphyrillic acid  
Protocetraric acid  
Protosiphulin  
Pseudocyphellarin A  
Pseudocyphellarin B  
Pseudoplacodiolic acid  
Psoromic acid  
Pulvinic acid  
Pulvinic dilactone  
Pulvinone  
Ramalic acid

Rangiformic acid  
Resokaempferol  
Rhabarberone  
Rhamnetin  
Rhizinonic acid  
Rhizocarpic acid  
Rhodocladonic acid  
Salizinic acid  
Scabrosin  
Schizopeltic acid  
Secalonic acid A  
Secalonic acid B  
Secalonic acid C  
Sekikaic acid  
Sexangularetin  
Siphulelic acid  
Siphulin  
Skyrin  
Solorinic acid  
Sordidone  
Sphaerophorin  
Squamatic acid  
Stenosporic acid  
Stenosporonic acid  
Stictic acid  
Stictinic acid  
Strepsilin  
Subdidymic acid  
Submerochlorophaeic acid  
Subpaludosic acid  
Subpicrolichenic acid  
Substictic acid  
Succinprotocetraric acid  
Sulphuretin  
Superconfluentic acid  
Superlatolic acid  
Superpicrolichenic acid  
Sydowinin B  
Tamaraxetin  
Teloschistin  
Tenuiorin  
Tetra-O-methylaverythrin  
Thamnolic acid  
Thiomelin  
Thiophanic acid  
Thiophaninic acid  
threo-Hex-2-enaric acid, 2-deoxy-2-(4-methoxyphenyl)-5-C-phenyl-, 1,4-lactone, 6-methyl ester  
Thunberginol A  
Thuringione  
Umbilicaric acid  
Usnic acid  
Valsarin  
Variolaric acid  
Wedelolactone  
Verrucigeric acid  
Vicanicin  
Vinetorin  
Virensic acid  
Vittatolic acid  
Wrightiin  
Vulpinic acid  
Xanthorin

Xerocomic acid  
 $\alpha$ -Collatolic acid
